# Supplementary material
Source: PubMed Central journal article supplement (PMC5664179)
Supplement: NIHMS903558-supplement-1.pdf [file NIHMS903558-supplement-1.pdf]

**Supplementary Material**

1  
2  
3  
4  
5  
6  
7  
8  
9  
10  
11  
12  
13  
14  
15  
16  
17  
18  
19  
20  
21  
22  
23  
24  
25  
26

Ctenophore relationships and their placement as the sister group to all other animals

Nathan V. Whelan, Kevin M. Kocot, Tatiana P. Moroz, Krishanu Mukherjee, Peter Williams, Gustav Paulay, Leonid L. Moroz, Kenneth M. Halanych.

## 27 **Supplementary Discussion**

### 28 *Phylogenetics*

29 Inferred relationships among ctenophores using datasets generated to test relationships among  
30 metazoan phyla (Fig. 2, Supplementary Figs. S1-S15) resulted in nearly identical relationships as those  
31 inferred with the ctenophore specific datasets (Figs. 2, Supplementary Figs. S16-S19). When  
32 relationships differed (e.g., placement of *Dryodora glandiformis*) they were less well supported on trees  
33 inferred with datasets Metazoa\_ than conflicting nodes on trees generated with the ctenophore specific  
34 datasets (i.e., datasets Cteno\_; Figs. 2, 3, Supplementary Figs. S1-19). The ctenophore centric datasets  
35 had more genes overall and less genes missing from ctenophore species than the metazoan datasets  
36 (Supplementary Table S3), which likely explains the more robust placement of ctenophore species in  
37 analyses using the ctenophore centric datasets.

38 Inferred ctenophore relationships were identical for each ctenophore-centric dataset and  
39 analytical method (Fig. 2, S15-S18; Extended Data Table 4; all tree files have been deposited on  
40 FigShare). Removing outgroups had no effect on inferred relationships, indicating no effect of outgroup  
41 choice on ingroup relationships (see tree files deposited on FigShare for trees without outgroups). Such  
42 similarities between datasets with different amounts and types of potential causes of systematic error  
43 pruned suggest robust phylogenetic hypotheses of ctenophore relationships (Fig. 2, S15-S18).

44

### 45 *Model Performance and inferred non-bilaterian relationships*

46 Past phylogenomic studies that have criticized the ctenophores-sister hypothesis have invariably  
47 argued that sponges must be the sister lineage to all other animals because trees inferred with site-  
48 heterogeneous CAT models have recovered sponges sister to all other animals<sup>13,20,62,87,88</sup>. However,  
49 multiple recent studies using CAT models, including the present study, have recovered ctenophores  
50 sister to all other animals<sup>11,24,41</sup>. Nevertheless, the argument that CAT models should be used for

51 phylogenomic inference has deeper flaws<sup>24</sup>. Generally, when a study has increased taxon sampling for  
52 any given group, compared to previous studies, trees inferred with site-heterogeneous CAT models and  
53 site-homogeneous models are often found to be congruent (see <sup>24</sup> for examples), even if past studies  
54 with less taxon sampling recovered incongruent trees with CAT models and other models. Our results  
55 are testament to this pattern: some past studies that used both site-homogenous models and CAT  
56 models resulted in disagreement on the placement of Ctenophora<sup>20,62,86,87</sup>. However, with greater  
57 ctenophore taxon sampling than previous studies, we recovered ctenophores as the sister group to all  
58 other animals when using both site-homogeneous models and CAT models (Figs. 2, ED1, S1-S14). This  
59 pattern has also been seen among studies analyzing the phylogenetic placement of acoels and  
60 *Xenotrubella*<sup>42,88</sup>. We are aware of no instance where phylogenetic inference with CAT-GTR and  
61 partitioning on datasets with increased sampling compared to earlier datasets produced congruent trees  
62 that also matched those inferred with CAT models on datasets with lower taxon sampling. Rather, trees  
63 match those inferred with site-homogeneous models, as seen here with the placement of Ctenophores.  
64 Thus, the logical conclusion is that CAT models can often be less accurate than other substitution models  
65 at inferring accurate trees, particularly when taxon sampling is limited for critical lineages.

66         The above should not be misconstrued as an argument against site-heterogeneous models, but  
67 merely an argument against models that often recover incorrect relationships and happen to be site-  
68 heterogeneous. Moreover, a well-conceived model could be poorly implemented in end-user programs.  
69 Current implementations of both CAT-F81 and CAT-GTR do not accurately model site-heterogeneity, as  
70 heterogeneity inferred by CAT models arbitrarily scales with dataset size<sup>24</sup>. This is no more realistic than  
71 using partitioned site-homogeneous models<sup>24</sup>. In fact, it may be less realistic. Moreover, no one should  
72 expect that combining an infinite mixture of sites with equal exchangeability rates among amino acids,  
73 as done with CAT-F81, would allow a substitution model to perform well in phylogenetic inference.  
74 Equal exchangeabilities among amino acids is simply an unrealistic assumption. Well performing site-

75 heterogeneous models that are computationally tractable would be beneficial to the field, but CAT-F81  
76 is conclusively unrealistic and results in less accurate trees than CAT-GTR and partitioning. Therefore,  
77 the conclusion of Simion et al.<sup>21</sup> that sponges are the sister group to all other extant animals, which was  
78 entirely based off analyses with CAT-F81 is flawed.

79

#### 80 *Molecular Clock Analyses*

81 A time-calibrated tree was inferred with BEAST 2<sup>68</sup> using a relaxed molecular clock  
82 (Supplementary Fig. 15). Although the inferred age of some nodes (e.g., the MRCA of sampled  
83 bilaterians; Supplementary Fig. 15) are younger than what has been inferred in past studies<sup>73</sup>, we were  
84 most interested in the inferred age of Ctenophora relative to well-known diversification events. Thus,  
85 even with some uncertainty in the age of extant ctenophores, we can still test the 65 MYA bottleneck  
86 hypothesis<sup>12,13</sup> and approximately date the ctenophore MRCA with the molecular clock based tree  
87 inferred here (Supplementary Fig. 15).

88 The relative age of the MRCA of extant ctenophores was considerably younger than that of the  
89 respective MRCAs of Porifera, Cnidaria, and Bilateria (Supplementary Fig. S15). However, the MRCA of  
90 extant ctenophores was inferred as older than the age of the MRCA of *Hemithris digitata* + *Capitella*  
91 *teleta* (~476-551 MYA<sup>73</sup>), but younger than the origin of protostomes (~578-653 MYA<sup>73</sup>). Given the  
92 confidence interval associated with the inferred timing of extant ctenophore diversification  
93 (Supplementary Fig. 15) and previously hypothesized ages of bilaterian nodes<sup>73</sup>, the MRCA of extant  
94 ctenophores is most likely no younger than 250 MYA. This age estimate is much older than the  
95 previously hypothesized 65 MYA age of crown group ctenophores<sup>12,13</sup>. Even though timing of  
96 ctenophore diversification inferred here is rather imprecise, we can reject a species-diversity bottleneck  
97 associated with the K-T extinction (~65 MYA). That said, based on the diversity of putative ctenophore  
98 fossils that are not morphologically similar to any known, extant species<sup>14-16</sup>, plus the observation that

99 the extant ctenophore MRCA is considerably younger than both the MRCA of sponges and the MRCA of  
100 cnidarians (Supplementary Fig. S15), our analysis is consistent with a potentially large loss of diversity in  
101 the ctenophore lineage after its split from other Metazoa. We hypothesize that this loss of diversity, or  
102 bottleneck, occurred prior to or during the Permian-Triassic extinction<sup>30</sup>. However, we cannot rule out  
103 that it may have occurred farther in the past as cydippid fossils are known from the Devonian<sup>90,91</sup>. Future  
104 studies will be essential for more precisely testing this hypothesis with additional fossil calibrations and  
105 greater metazoan taxon sampling.

106

### 107 *Ancestral State Reconstruction*

108 As noted in the methods, characteristics of sampled ctenophores were assigned to each species  
109 using previous descriptive work and/or personal observations of individuals we collected  
110 (Supplementary Table S5). In some instances, previously reported character states were either unclear  
111 or contradictory, and we detail those issues below.

112 We could find no confirmed report of Platyctenida possessing the ability of bioluminescence,  
113 and we have never observed bioluminescence when collecting platyctenids at night. The site of  
114 bioluminescence in at least some ctenophores is below their comb rows<sup>36</sup>, but all platyctenids lose their  
115 comb rows during development (except *Ctenoplana*, which we were unable to collect). Therefore, most  
116 platyctenids may simply lose the ability of bioluminescence during development. To account for this  
117 uncertainty, platyctenids collected here were coded as ambiguous concerning their character state for  
118 bioluminescence (Supplementary Table S5). The ability of bioluminescence has also not been explicitly  
119 addressed in the literature for *Pukia falcata*. We have observed this species at night, but we have not  
120 observed bioluminescence. Given this, and the placement of *P. falcata* as nested in a clade with other  
121 species that are not bioluminescent (Supplementary Fig. S24), we coded *P. falcata* as lacking  
122 bioluminescence (Supplementary Table S5).

123 Most character states for feeding mode were obtained from Haddock<sup>38</sup> with three exceptions.  
124 First, we coded *Cestum veneris* as capturing food primarily with tentacles rather than lobes. Although  
125 the ribbon morphology of cestids is derived from an ancestor with body lobes (Fig. 3), as hypothesized  
126 by Haddock<sup>38</sup>, we argue that food capture by cestids is ultimately done with tentacles as noted by  
127 Matsumoto and Harbison<sup>78</sup> and Stretch<sup>80</sup>. Therefore, *Cestum veneris* was coded as using tentacles as its  
128 primary means of food capture. Second, according to the original species description<sup>77</sup>, *Lobatolampea*  
129 *tetragona* feeds similarly to *Cestum veneris* and was coded as using primarily tentacles for feeding.  
130 Finally, even though *Dryodora glandiformis* possesses tentacles that they may use to sense stimuli,  
131 including food, we coded their primary food capture method as engulfing. There are no reports of  
132 *Dryodora glandiformis* physically capturing its prey with tentacles, and we doubt the simplified tentacles  
133 of *Dryodora glandiformis* could be used to capture the larvaceans it exclusively feeds upon. More  
134 broadly, one could argue that all species with lobes, except *Ocyropsis* because adults lack tentacles, use  
135 tentacles as adults in some fashion for food capture, rather than just their lobes. Thus, one could  
136 conceivably code feeding mode in a much finer manner. However, we were interested in broad  
137 evolutionary patterns so we coded character states as primary food capture mode rather than splitting  
138 feeding and food capture mode into many different character states that would have provided little  
139 insight into macroevolutionary patterns.

140 The ancestral state reconstruction analyses reported in the main text (Figs. 3-5, Supplementary  
141 Figs. S20-S22, S24, S25) ignored uncertainty in both relationships and branch length. In order to estimate  
142 how uncertainty in branch-length may, or may not, affect ancestral state reconstruction, we used  
143 MrBayes 3.2.6<sup>90</sup> to generate a posterior distribution of trees for dataset Cteno\_RCFV\_LB. A full analysis  
144 in MrBayes would not have converged in a reasonable time frame, so relationships were constrained  
145 based on the topology inferred using Cteno\_RCFV\_LB and RAxML (Fig. 2), but branch lengths were  
146 estimated. The dataset was partitioned following best-fit partitions as inferred with PartitionFinder. We

147 used two runs with four metropolis coupled MCMC chains to estimate branch lengths, and each run was  
148 sampled every 1000 generations for  $2.68 \times 10^6$  generation; we also sampled across model space using  
149 rjMCMC (MrBayes command `nst=mixed`) because not all best-fit models were implemented in MrBayes.  
150 Convergence was tested using the MrBayes `sump` command and a burn-in of 25%; standard deviation of  
151 split frequencies was 0.00 and potential scale reduction factor of each parameter was 1.0, indicating  
152 convergence of independent Bayesian runs. Joint posterior probabilities of ancestral states at each node  
153 was inferred as described in the methods section, but 50 trees from the post-burn in posterior  
154 distribution of trees was used and only 1,000 MCMC generations of stochastic mapping were run for  
155 each tree in the posterior distribution; this was done to limit required computational time. Incorporating  
156 branch-length uncertainty into ancestral state reconstruction did not have a meaningful effect on  
157 inferred states (data available on FigShare). We chose to emphasize the analysis where uncertainty was  
158 ignored for two reasons: 1) forcing topological constraints on the MrBayes analyses was less than ideal  
159 and merely done for computational reasons, 2) many of the best-fit models (e.g., LG) are not  
160 implemented in MrBayes, possibly resulting in less accurate branch length estimates than those inferred  
161 with RAxML.

162

### 163 *Ribosomal Gene Tree*

164 Despite great efforts to sample as many ctenophore lineages as possible, obtaining tissue  
165 samples suitable for transcriptome sequencing was not possible for some lineages. We were also unable  
166 to photograph every sampled individual before preserving tissue. Therefore, we also assembled an 18S  
167 rRNA tree using sequences obtained from GenBank and transcriptomes sequenced here, when possible  
168 (Supplementary Table S6); we were unable to recover reasonably complete 18S rRNA genes from some  
169 transcriptomes. The 18S rRNA gene tree was inferred with RAxML using the GTR+ $\Gamma$  substitution model,  
170 and nodal support was assessed with 1,000 fast bootstrap replicates (Supplementary Fig. S23).

171 Specimens sequenced here with useable 18S sequences were recovered as close relatives of individuals  
172 from the same species that were sequenced in past studies (Supplementary Fig. S23)<sup>12,13</sup>. This is  
173 evidence that these species identifications were accurate, or at least consistent with those of previous  
174 workers. The inferred 18S rRNA tree also suggests possible identifications for some specimens we were  
175 not able to name. For example, we sequenced an unidentified *Pleurobrachia* sp. Florida, USA that has an  
176 18S sequence that is nearly identical to that of a specimen of *Pleurobrachia brunnea* sequenced by  
177 Simion et al.<sup>13</sup>.

178 Most deep nodes in the 18S tree had low BS support (<50), but no strongly-supported nodes  
179 were in conflict with our transcriptome based trees (Figs. 3-5, Supplementary Figs. S16-S19, S23).  
180 Consistent with our phylogenomic analyses, the monotypic family Pukiidae (*Pukia falcata*) is nested  
181 within Pleurobrachiidae on the 18S gene tree. Analysis of 18S supports the paraphyly of Mertensiidae,  
182 albeit with poor BS support. Although 18S appears useful for confirming species ID, the general lack of  
183 support for most nodes illustrates the usefulness of the transcriptome-based phylogenomic approach  
184 used here for inferring relationships among ctenophores.

185

## 186 **References**

187 86 Philippe, H. *et al.* Resolving difficult phylogenetic questions: why more sequences are not  
188 enough. *PLoS Biol.* **9**, e1000602, (2011).

189 87 Philippe, H. *et al.* Phylogenomics revives traditional views on deep animal relationships. *Curr.*  
190 *Biol.* **19**, 706-712, (2009).

191 88 Simakov, O. *et al.* Hemichordate genomes and deuterostome origins. *Nature* **527**, 459-465,  
192 (2015).

193 89 Ronquist, F. *et al.* MrBayes 3.2: efficient bayes inference and model choice across a large model  
194 space. *Syst. Biol.* **61**, 539-542, (2012).



- 195 90 Stanley, G.D. & Stürmer, W. The first fossil ctenophore from the lower Devonian of West  
196 Germany. *Nature*. **303**, 518-520, (1983).
- 197 91 Stanley, G.D. & Stürmer, W. A new fossil ctenophore discovered by X-rays. *Nature*. **328**, 61-63,

Table S1: Taxon sampling for ctenophore-centric phylogenetic analyses

| Phylum     | Family           | Species                                  | Collection Locality <sup>^</sup> | Latitude (°) | Longitude (°) | Raw Reads   | Assembled Transcripts | NCBI SRA, BioProject, or other Accession                                                            |
|------------|------------------|------------------------------------------|----------------------------------|--------------|---------------|-------------|-----------------------|-----------------------------------------------------------------------------------------------------|
| Ctenophora |                  |                                          |                                  |              |               |             |                       |                                                                                                     |
|            | Euplokamididae   | <i>Euplokamis dunlapae</i>               | -                                | -            | -             | 34,151,349  | 160,775               | SRR777663                                                                                           |
|            | Coeloplanidae    | <i>Coeloplana astericola</i>             | -                                | -            | -             | 20,842,610  | 111,307               | SRR786490                                                                                           |
|            |                  | <i>Benthoplana meteoris</i>              | Luzon Island, Philippines        | 13.93        | 120.61        | 52,070,847  | 29,620                | PRJNA396415                                                                                         |
|            |                  | <i>Vallicula</i> sp.                     | -                                | -            | -             | 24,545,186  | 159,357               | SRR786489                                                                                           |
|            | Pleurobrachiidae | <i>Hormiphora californica</i>            | -                                | -            | -             | 32,337,982  | 79,758                | SRR1992642                                                                                          |
|            |                  | <i>Hormiphora palmata</i>                | Kona Coast, Hawaii, USA          | 19.617       | -156.085      | 47,328,392  | 50,591                | PRJNA396415                                                                                         |
|            |                  | <i>Pleurobrachia bachei</i>              | -                                | -            | -             | N/A         | 19,524                | <a href="http://neurobase.rc.ufl.edu/pleurobrachia/">http://neurobase.rc.ufl.edu/pleurobrachia/</a> |
|            |                  | <i>Pleurobrachia pileus</i>              | New Jersey, USA                  | 40.383       | -73.801       | 29,169,744  | 56,415                | PRJNA396415                                                                                         |
|            |                  | <i>Pleurobrachia pileus</i>              | -                                | -            | -             | 25,313,211  | 197,803               | SRR789901                                                                                           |
|            |                  | <i>Pleurobrachia</i> sp.                 | Florida, USA                     | 30.337       | -81.661       | 17,434,098  | 43,885                | PRJNA396415                                                                                         |
|            |                  | <i>Pleurobrachia</i> sp.                 | South Carolina, USA              | 32.029       | -79.725       | 16,271,430  | 49,172                | PRJNA396415                                                                                         |
|            |                  | <i>Pleurobrachia</i> sp.                 | South Carolina, USA              | 32.029       | -79.725       | 39,919,758  | 59,827                | PRJNA396415                                                                                         |
|            | Pukiidae         | <i>Pukia falcata</i>                     | Queensland, Australia            | -27.25       | 153.25        | 94,637,042  | 117,469               | PRJNA396415                                                                                         |
|            | Mertensiidae     | <i>Callianira antarctica</i>             | Antarctica                       | -65.095      | -63.168       | 61,446,864  | 68,595                | PRJNA396415                                                                                         |
|            |                  | Mertensiidae sp. (Washington, USA)       | -                                | -            | -             | 23,727,123  | 134,815               | SRR786492                                                                                           |
|            |                  | Mertensiidae sp.                         | Antarctica                       | -64.65       | -62.397       | 54,973,357  | 97,238                | PRJNA396415                                                                                         |
|            | Dryodoridae      | <i>Dryodora glandiformis</i>             | -                                | -            | -             | 20,634,583  |                       | SRR777788                                                                                           |
|            | Beroidae         | <i>Beroe ovata</i>                       | South Carolina, USA              | 32.029       | -79.725       | 15,579,602  | 51,295                | PRJNA396415                                                                                         |
|            |                  | <i>Beroe</i> sp.                         | Queensland, Australia            | -27.25       | 153.25        | 44,128,606  | 58,258                | PRJNA396415                                                                                         |
|            |                  | <i>Beroe forskalii</i>                   | South Carolina, USA              | 32.553       | -79.308       | 37,374,286  | 121,008               | PRJNA396415                                                                                         |
|            |                  | <i>Beroe</i> sp.                         | Antarctica                       | -64.406      | -61.916       | 52,294,485  | 37,475                | PRJNA396415                                                                                         |
|            |                  | <i>Beroe abyssicola</i>                  | -                                | -            | -             | 22,722,322  |                       | SRR777787                                                                                           |
|            | Bolinopsidae     | <i>Bolinopsis ashleyi</i>                | Queensland, Australia            | -27.25       | 153.25        | 47,700,132  | 72,847                | PRJNA396415                                                                                         |
|            |                  | <i>Bolinopsis infundibulum</i>           | Washington, USA                  | 48.545       | -123.012      | 32,028,806  | 143,811               | PRJNA396415                                                                                         |
|            |                  | <i>Mnemiopsis leidyi</i>                 | -                                | -            | -             | N/A         | 16,548                | <a href="https://kona.nhgri.nih.gov/mnemiopsis/">https://kona.nhgri.nih.gov/mnemiopsis/</a>         |
|            |                  | <i>Mnemiopsis leidyi</i>                 | New Jersey, USA                  | 39.717       | -73.598       | 28,950,980  | 71,599                | PRJNA396415                                                                                         |
|            |                  | <i>Mnemiopsis mccradyi</i>               | Florida, USA                     | -            | -             | 67,036,948  | 149,455               | PRJNA396415                                                                                         |
|            | Eurhamphaeidae   | <i>Eurhamphaea vexilligera</i>           | Bimini, Bahamas                  | 25.733       | -79.25        | 44,812,330  | 47,832                | PRJNA396415                                                                                         |
|            | Cestidae         | <i>Cestum veneris</i>                    | Bimini, Bahamas                  | 25.733       | -79.25        | 146,947,617 | 99,132                | PRJNA396415                                                                                         |
|            | Ocyropsidae      | <i>Ocyropsis crystallina</i>             | North Carolina, USA              | 34.444       | -75.972       | 20,398,482  | 143,811               | PRJNA396415                                                                                         |
|            |                  | <i>Ocyropsis</i> sp.                     | Florida, USA                     | 26.709       | -80.064       | 65,159,704  | 116,128               | PRJNA396415                                                                                         |
|            |                  | <i>Ocyropsis crystallina guttata</i>     | Bimini, Bahamas                  | 25.733       | -79.25        | 43,217,528  | 95,632                | PRJNA396415                                                                                         |
|            | Lobatolampeidae  | <i>Lobatolampea tetragona</i>            | Luzon Island, Philippines        | 13.93        | 120.61        | 66,945,305  | 72,868                | PRJNA396415                                                                                         |
|            | Unidentified     | <i>Lobata</i> sp.                        | Punta Arenas, Chile              | -53.17       | -70.907       | 51,629,293  | 57,045                | PRJNA396415                                                                                         |
|            |                  | <i>Cydippida</i> sp. (Washington, USA)‡  | -                                | -            | -             | 21,688,585  | 174,129               | SRR786491                                                                                           |
|            |                  | <i>Cydippida</i> sp.                     | Antarctica                       | -63.439      | -55.453       |             |                       | PRJNA396415                                                                                         |
|            |                  | <i>Cydippida</i> sp.                     | Maryland, USA                    | 37.863       | -74.329       | 41,738,834  | 128,628               | PRJNA396415                                                                                         |
|            |                  | <i>Ctenophora</i> sp. (larval specimen)‡ | Florida, USA                     | 30.337       | -81.661       | 23,206,288  | 50,273                | PRJNA396415                                                                                         |
| Porifera   |                  |                                          |                                  |              |               |             |                       |                                                                                                     |
|            |                  | <i>Sycon coactum</i>                     | -                                | -            | -             | N/A         | 70,220                | <a href="http://dx.doi.org/10.7910/DVN/24737">http://dx.doi.org/10.7910/DVN/24737</a>               |
|            |                  | <i>Latrunculia apicalis</i>              | -                                | -            | -             | 12,691,254  | 76,210                | SRR1915755                                                                                          |
|            |                  | <i>Spongilla alba</i>                    | -                                | -            | -             | N/A         | 56,696                | <a href="http://dx.doi.org/10.7910/DVN/24737">http://dx.doi.org/10.7910/DVN/24737</a>               |
|            |                  | <i>Amphimedon queenslandica</i>          | -                                | -            | -             | N/A         | 63,542                | dbEST                                                                                               |
| Cnidaria   |                  |                                          |                                  |              |               |             |                       |                                                                                                     |
|            |                  | <i>Eunicella verrucosa</i>               | -                                | -            | -             | 70,071,835  | 32,637                | SRR1324944; SRR1324945                                                                              |
|            |                  | <i>Nematostella vectensis</i>            | -                                | -            | -             | N/A         |                       | Joint Genome Institute                                                                              |
|            |                  | <i>Hydra vulgaris</i>                    | -                                | -            | -             | N/A         | 45,250                | dbEST                                                                                               |
|            |                  | <i>Agalma elegans</i>                    | -                                | -            | -             | 53,998,182  | 217,596               | SRR871526                                                                                           |

‡Taxa excluded from ancestral state reconstruction

^Not provided for taxa sequenced elsewhere

Tables S2: Taxon sampling for Metazoa phylogenetic analyses

| <u>Taxon</u>                                                               | <u>NCBI or other accession</u>                                                                                                                                                         |
|----------------------------------------------------------------------------|----------------------------------------------------------------------------------------------------------------------------------------------------------------------------------------|
| <b>Ichthyosporea</b>                                                       |                                                                                                                                                                                        |
| <i>Amoebidium parasiticum</i> †                                            | <a href="http://www.broadinstitute.org/annotation/genome/multicellularity_project/MultiHome.html">www.broadinstitute.org/annotation/genome/multicellularity_project/MultiHome.html</a> |
| <i>Sphaeroforma arctica</i> †                                              | <a href="http://www.broadinstitute.org/annotation/genome/multicellularity_project/MultiHome.html">www.broadinstitute.org/annotation/genome/multicellularity_project/MultiHome.html</a> |
| <b>Filasteria</b>                                                          |                                                                                                                                                                                        |
| <i>Capsaspora owczarzaki</i> †                                             | <a href="http://www.broadinstitute.org/annotation/genome/multicellularity_project/MultiHome.html">www.broadinstitute.org/annotation/genome/multicellularity_project/MultiHome.html</a> |
| <i>Ministeria vibrans</i> †                                                | SRR343051                                                                                                                                                                              |
| <b>Choanoflagellata</b>                                                    |                                                                                                                                                                                        |
| <i>Acanthoeca</i> sp.                                                      | SRR1294413; SRR1296844                                                                                                                                                                 |
| <i>Monosiga brevicolis</i>                                                 | Joint Genome Institute                                                                                                                                                                 |
| <i>Monosiga ovata</i>                                                      | NCBI dbEST                                                                                                                                                                             |
| <i>Salpingoeca pyxidium</i>                                                | SRR1915694                                                                                                                                                                             |
| <i>Salpingoeca rosetta</i>                                                 | <a href="http://www.broadinstitute.org/annotation/genome/multicellularity_project/MultiHome.html">www.broadinstitute.org/annotation/genome/multicellularity_project/MultiHome.html</a> |
| <b>Ctenophora</b>                                                          |                                                                                                                                                                                        |
| <i>Beroë forskalii</i>                                                     | PRJNA396415                                                                                                                                                                            |
| <i>Beroë abyssicola</i>                                                    | SRR777787                                                                                                                                                                              |
| <i>Beroë ovata</i>                                                         | PRJNA396415                                                                                                                                                                            |
| <i>Beroë</i> sp. Antarctica                                                | PRJNA396415                                                                                                                                                                            |
| <i>Beroë</i> sp. Queensland, Australia                                     | PRJNA396415                                                                                                                                                                            |
| <i>Bolinopsis ashleyi</i>                                                  | PRJNA396415                                                                                                                                                                            |
| <i>Bolinopsis infundibulum</i> ‡                                           | PRJNA396415                                                                                                                                                                            |
| <i>Callianira antarctica</i>                                               | PRJNA396415                                                                                                                                                                            |
| <i>Cestum veneris</i>                                                      | PRJNA396415                                                                                                                                                                            |
| <i>Coeloplana astericola</i>                                               | SRR786490                                                                                                                                                                              |
| <i>Ctenophora</i> sp. Florida, USA                                         | PRJNA396415                                                                                                                                                                            |
| <i>Cydippida</i> sp. Maryland, USA                                         | PRJNA396415                                                                                                                                                                            |
| <i>Cydippida</i> sp. Washington, USA                                       | SRR786491                                                                                                                                                                              |
| <i>Dryodora glandiformis</i> ‡                                             | SRR777788                                                                                                                                                                              |
| <i>Euplokamis dunlapae</i>                                                 | SRR777663                                                                                                                                                                              |
| <i>Eurhampheae vexilligera</i>                                             | PRJNA396415                                                                                                                                                                            |
| <i>Hormiphora californica</i>                                              | PRJNA396415                                                                                                                                                                            |
| <i>Hormiphora palmata</i>                                                  | PRJNA396415                                                                                                                                                                            |
| <i>Lobata</i> sp. Punta Arenas‡                                            | PRJNA396415                                                                                                                                                                            |
| <i>Lobatalampea tetragona</i> ‡                                            | PRJNA396415                                                                                                                                                                            |
| Mertensiidae sp. Antarctica                                                | PRJNA396415                                                                                                                                                                            |
| Mertensiidae sp. Washington, USA                                           | PRJNA396415                                                                                                                                                                            |
| <i>Mnemiopsis leidyi</i>                                                   | SRR789900                                                                                                                                                                              |
| <i>Ocyropsis crystallina</i>                                               | PRJNA396415                                                                                                                                                                            |
| <i>Ocyropsis</i> sp. Florida, USA                                          | PRJNA396415                                                                                                                                                                            |
| <i>Ocyropsis crystallina guttata</i>                                       | PRJNA396415                                                                                                                                                                            |
| <i>Pleurobrachia bachei</i> ‡                                              | neurobase.rc.ufl.edu.pleurobrachia                                                                                                                                                     |
| <i>Pleurobrachia pileus</i>                                                | PRJNA396415                                                                                                                                                                            |
| <i>Pleurobrachia</i> sp.                                                   | SRR789901                                                                                                                                                                              |
| <i>Vallricula</i> sp.                                                      | SRR786489                                                                                                                                                                              |
| <b>Porifera</b>                                                            |                                                                                                                                                                                        |
| <i>Amphimedon queenslandica</i>                                            | NCBI dbEST                                                                                                                                                                             |
| <i>Aphrocallistes vastus</i>                                               | Evolution and Research Archive                                                                                                                                                         |
| <i>Chondrilla nucula</i>                                                   | <a href="http://dx.doi.org/10.7910/DVN/24737">http://dx.doi.org/10.7910/DVN/24737</a>                                                                                                  |
| <i>Cliona varians</i>                                                      | SRR1391011                                                                                                                                                                             |
| <i>Corticium candelabrum</i>                                               | <a href="http://dx.doi.org/10.7910/DVN/24737">http://dx.doi.org/10.7910/DVN/24737</a>                                                                                                  |
| <i>Crella elegans</i>                                                      | <a href="http://dx.doi.org/10.5061/dryad.50dc6/3">http://dx.doi.org/10.5061/dryad.50dc6/3</a>                                                                                          |
| <i>Hyalonema populiferum</i>                                               | SRR1916923                                                                                                                                                                             |
| <i>Ircinia fasciculata</i>                                                 | <a href="http://dx.doi.org/10.7910/DVN/24737">http://dx.doi.org/10.7910/DVN/24737</a>                                                                                                  |
| <i>Kirkpatrickia variolosa</i>                                             | SRR1916957                                                                                                                                                                             |
| <i>Latrunculia apicalis</i>                                                | SRR1915755                                                                                                                                                                             |
| <i>Mycale phytophylla</i>                                                  | SRR1711043                                                                                                                                                                             |
| <i>Oscarella carmela</i>                                                   | <a href="http://www.compagen.org">www.compagen.org</a>                                                                                                                                 |
| <i>Petrosia ficiformis</i>                                                 | <a href="http://dx.doi.org/10.7910/DVN/24737">http://dx.doi.org/10.7910/DVN/24737</a>                                                                                                  |
| <i>Pseudospongosarites suberitoides</i>                                    | <a href="http://dx.doi.org/10.7910/DVN/24737">http://dx.doi.org/10.7910/DVN/24737</a>                                                                                                  |
| <i>Rossella fibulata</i>                                                   | SRR1915835                                                                                                                                                                             |
| <i>Spongilla alba</i>                                                      | <a href="http://dx.doi.org/10.7910/DVN/24737">http://dx.doi.org/10.7910/DVN/24737</a>                                                                                                  |
| <i>Sycon ciliatum</i>                                                      | ERR592861                                                                                                                                                                              |
| <i>Sycon coactum</i>                                                       | <a href="http://dx.doi.org/10.7910/DVN/24737">http://dx.doi.org/10.7910/DVN/24737</a>                                                                                                  |
| <i>Sympagella nux</i>                                                      | SRR1916581                                                                                                                                                                             |
| <b>Placozoa</b>                                                            |                                                                                                                                                                                        |
| <i>Trichoplax adhaerens</i>                                                | Joint Genome Institute                                                                                                                                                                 |
| <b>Cnidaria</b>                                                            |                                                                                                                                                                                        |
| <i>Abylopsis tetragona</i>                                                 | SRR871525                                                                                                                                                                              |
| <i>Acropora digitifera</i>                                                 | DRR055157                                                                                                                                                                              |
| <i>Agalma elegans</i>                                                      | SRR871526                                                                                                                                                                              |
| <i>Aiptasia pallida</i>                                                    | SRR696721; SRR696732; SRR696745                                                                                                                                                        |
| <i>Bolocera tuediae</i>                                                    | SRR504347                                                                                                                                                                              |
| <i>Craseo lathetica</i>                                                    | SRR871529                                                                                                                                                                              |
| <i>Eunicella verrucosa</i>                                                 | SRR1324944; SRR1324945                                                                                                                                                                 |
| <i>Hormathia digitata</i>                                                  | SRR504348                                                                                                                                                                              |
| <i>Hydra oligactis</i>                                                     | SRR040466; SRR040467; SRR040468; SRR040469                                                                                                                                             |
| <i>Hydra viridissima</i>                                                   | SRR040470; SRR040471; SRR040472; SRR040473                                                                                                                                             |
| <i>Hydra vulgaris</i>                                                      | NCBI dbEST                                                                                                                                                                             |
| <i>Nanomia bijuga</i>                                                      | SRR871527                                                                                                                                                                              |
| <i>Nematostella vectensis</i>                                              | Joint Genome Institute                                                                                                                                                                 |
| <i>Periphylla periphylla</i>                                               | SRR191582                                                                                                                                                                              |
| <i>Physalia physalia</i>                                                   | SRR871528                                                                                                                                                                              |
| <b>Bilateria</b>                                                           |                                                                                                                                                                                        |
| <i>Capitella teleta</i>                                                    | Joint Genome Institute                                                                                                                                                                 |
| <i>Daphnia pulex</i>                                                       | Joint Genome Institute                                                                                                                                                                 |
| <i>Drosophila melanogaster</i>                                             | HaMStR Core Orthologs                                                                                                                                                                  |
| <i>Hemithris digitata</i>                                                  | SRR1611556                                                                                                                                                                             |
| <i>Homo sapiens</i>                                                        | HaMStR Core Orthologs                                                                                                                                                                  |
| <i>Strongylocentrotus purpuratus</i>                                       | InParanoid Database                                                                                                                                                                    |
| ‡Species excluded from CAT-GTR analyses to facilitate Bayesian convergence |                                                                                                                                                                                        |

Supplementary Table S3: Phylogenetic datasets

| Dataset                                       | Number of Genes | Number of Amino Acids | Missing data (%) | Genes that may cause systematic error removed      |
|-----------------------------------------------|-----------------|-----------------------|------------------|----------------------------------------------------|
| Metazoa_full                                  | 224             | 68,082                | 46.25            | Paralogs                                           |
| Metazoa_RCFV_relaxed                          | 205             | 65,347                | 46.98            | Paralogs, heterogeneous genes                      |
| Metazoa_RCFV_strict                           | 116             | 43,324                | 50.20            | Paralogs, heterogeneous genes                      |
| Metazoa_LB_relaxed                            | 164             | 51,211                | 45.70            | Paralogs, long-branched genes                      |
| Metazoa_LB_strict                             | 156             | 46,959                | 45.62            | Paralogs, long-branched genes                      |
| Metazoa_RCFV_LB_relaxed                       | 149             | 49,051                | 46.45            | Paralogs, long-branched genes, heterogeneous genes |
| Metazoa_RCFV_LB_strict                        | 74              | 28,759                | 49.50            | Paralogs, long-branched genes, heterogeneous genes |
| Metazoa_Choano <sup>α</sup>                   | 234             | 75,840                | 48.79            | Paralogs                                           |
| Metazoa_Choano_RCFV_relaxed <sup>α</sup>      | 161             | 59,699                | 50.27            | Paralogs, heterogeneous genes                      |
| Metazoa_Choano_RCFV_strict <sup>α</sup>       | 127             | 49,405                | 52.81            | Paralogs, heterogeneous genes                      |
| Metazoa_Choano_RCFV_strict_Bayes <sup>α</sup> | 127             | 49,388                | 50.34            | Paralogs, heterogeneous genes, unstable taxa       |
| Metazoa_Choano_LB_relaxed <sup>α</sup>        | 164             | 51,211                | 45.70            | Paralogs, long-branched genes                      |
| Metazoa_Choano_LB_strict <sup>α</sup>         | 156             | 46,959                | 45.62            | Paralogs, long-branched genes                      |
| Metazoa_Choano_RCFV_LB_relaxed <sup>α</sup>   | 149             | 49,051                | 46.45            | Paralogs, long-branched genes, heterogeneous genes |
| Metazoa_Choano_RCFV_LB_strict <sup>α</sup>    | 74              | 28,759                | 49.50            | Paralogs, long-branched genes, heterogeneous genes |
| Ctenophore_full*                              | 350             | 98,844                | 43.55            | Paralogs                                           |
| Ctenophore_RCFV*                              | 280             | 84,187                | 43.57            | Paralogs, heterogeneous genes                      |
| Ctenophore_LB*                                | 268             | 78,100                | 43.49            | Paralogs, long-branched genes                      |
| Ctenophore_RCFV_LB*                           | 217             | 68,194                | 44.02            | Paralogs, long-branched genes, heterogeneous genes |

\*Datasets with outgroups removed were also analyzed

<sup>α</sup>Non-choanoflagellate outgroups were excluded during orthology determination and downstream dataset filtering

Supplementary Table S4: Fossil Calibrations for molecular clock analyses that failed to reach convergence

| Node (MRCA)  | Calibration |      |       |       |      |        |
|--------------|-------------|------|-------|-------|------|--------|
|              | Shape       | mean | sigma | alpha | beta | offset |
| Metazoa      | normal      | 750  | 35    | -     | -    | -      |
| Cnidaria     | gamma       | -    | -     | 2.0   | 2.0  | 529    |
| Bilateria    | gamma       | -    | -     | 2.0   | 2.0  | 554    |
| Duetrostomia | gamma       | -    | -     | 2.0   | 2.0  | 515    |
| Porifera     | gamma       | -    | -     | 2.4   | 3.3  | 535    |
| Protostomia  | gamma       | -    | -     | 2.0   | 2.0  | 552    |

Supplementary Table S5: Traits of extant taxa used for ancestral state reconstruction

| Species                                   | Body Plan | Tentacles<br>(Present/Absent) | Tentacles in Adults<br>(Present/Absent) | Smooth muscles<br>(Present/Absent) | Striated muscles<br>(Present/Absent) | Separate Sexes<br>(Present/Absent) | Benthic or Pelagic | Bioluminescence<br>(Present/Absent) | Feeding Mode |
|-------------------------------------------|-----------|-------------------------------|-----------------------------------------|------------------------------------|--------------------------------------|------------------------------------|--------------------|-------------------------------------|--------------|
| Benthoplana meteoris                      | P         | P                             | P                                       | P                                  | A                                    | A                                  | B                  | P,A                                 | T            |
| Beroe abyssicola                          | N         | A                             | A                                       | P                                  | A                                    | A                                  | Pe                 | P                                   | E            |
| Beroe forskalii                           | N         | A                             | A                                       | P                                  | A                                    | A                                  | Pe                 | P                                   | E            |
| Beroe ovata                               | N         | A                             | A                                       | P                                  | A                                    | A                                  | Pe                 | P                                   | E            |
| Beroe sp. Antarctica                      | N         | A                             | A                                       | P                                  | A                                    | A                                  | Pe                 | P                                   | E            |
| Beroe sp. Queensland, Australia           | N         | A                             | A                                       | P                                  | A                                    | A                                  | Pe                 | P                                   | E            |
| Bolinopsis ashleyi                        | L         | P                             | P                                       | P                                  | A                                    | A                                  | Pe                 | P                                   | L            |
| Bolinopsis infundibulum                   | L         | P                             | P                                       | P                                  | A                                    | A                                  | Pe                 | P                                   | L            |
| Callianira antarctica                     | C         | P                             | P                                       | P                                  | A                                    | A                                  | Pe                 | P                                   | T            |
| Cestum veneus                             | R         | P                             | P                                       | P                                  | A                                    | A                                  | Pe                 | P                                   | T            |
| Coeloplana astericola                     | P         | P                             | P                                       | P                                  | A                                    | A                                  | B                  | P,A                                 | T            |
| Cydippida sp. Antarctica                  | C         | P                             | P                                       | P                                  | A                                    | A                                  | Pe                 | P                                   | T            |
| Cydippida sp. Maryland                    | C         | P                             | P                                       | P                                  | A                                    | A                                  | Pe                 | P                                   | T            |
| Dryodora glandiformis                     | C         | P                             | P                                       | P                                  | A                                    | A                                  | Pe                 | P                                   | E            |
| Euplokamis dunlapae                       | C         | P                             | P                                       | P                                  | P                                    | A                                  | Pe                 | P                                   | T            |
| Eurhamphaea vexilligera                   | L         | P                             | P                                       | P                                  | A                                    | A                                  | Pe                 | P                                   | L            |
| Hormiphora californica                    | C         | P                             | P                                       | P                                  | A                                    | A                                  | Pe                 | P                                   | T            |
| Hormiphora palmata                        | C         | P                             | P                                       | P                                  | A                                    | A                                  | Pe                 | P                                   | T            |
| Lobata sp. Punta Arenas, Chile            | L         | P                             | P                                       | P                                  | A                                    | A                                  | Pe                 | P                                   | L            |
| Lobatolampea tetragona                    | L         | P                             | P                                       | P                                  | A                                    | A                                  | B                  | P                                   | T            |
| Mertensiidae sp. Washington, USA          | C         | P                             | P                                       | P                                  | A                                    | A                                  | Pe                 | P                                   | T            |
| Mnemiopsis leidyi                         | L         | P                             | P                                       | P                                  | A                                    | A                                  | Pe                 | P                                   | L            |
| Mnemiopsis mccradyi                       | L         | P                             | P                                       | P                                  | A                                    | A                                  | Pe                 | P                                   | L            |
| Mnemiopsis sp. New Jersey, USA            | L         | P                             | P                                       | P                                  | A                                    | A                                  | Pe                 | P                                   | L            |
| Ocyropsis crystallina                     | L         | P                             | A                                       | P                                  | A                                    | P                                  | Pe                 | P                                   | L            |
| Ocyropsis sp. Bimini, Bahamas             | L         | P                             | A                                       | P                                  | A                                    | P                                  | Pe                 | P                                   | L            |
| Ocyropsis sp. Florida, USA                | L         | P                             | A                                       | P                                  | A                                    | P                                  | Pe                 | P                                   | L            |
| Pleurobrachia bachei                      | C         | P                             | P                                       | P                                  | A                                    | A                                  | Pe                 | A                                   | T            |
| Pleurobrachia pileus (1)                  | C         | P                             | P                                       | P                                  | A                                    | A                                  | Pe                 | A                                   | T            |
| Pleurobrachia pileus (2)                  | C         | P                             | P                                       | P                                  | A                                    | A                                  | Pe                 | A                                   | T            |
| Pleurobrachia sp. Florida, USA            | C         | P                             | P                                       | P                                  | A                                    | A                                  | Pe                 | A                                   | T            |
| Pleurobrachis sp. (1) South Carolina, USA | C         | P                             | P                                       | P                                  | A                                    | A                                  | Pe                 | A                                   | T            |
| Pleurobrachis sp. (2) South Carolina, USA | C         | P                             | P                                       | P                                  | A                                    | A                                  | Pe                 | A                                   | T            |
| Pukia falcata                             | C         | P                             | P                                       | P                                  | A                                    | A                                  | Pe                 | A                                   | T            |
| Vallicula sp.                             | P         | P                             | P                                       | P                                  | A                                    | A                                  | B                  | P,A                                 | T            |
| Agalma elegans                            | -         | -                             | -                                       | P                                  | P                                    | -                                  | -                  | -                                   |              |
| Hydra vulgaris                            | -         | -                             | -                                       | P                                  | A                                    | -                                  | -                  | -                                   |              |
| Nematostella vectensis                    | -         | -                             | -                                       | P                                  | A                                    | -                                  | -                  | -                                   |              |
| Eunicella verrucosa                       | -         | -                             | -                                       | P                                  | A                                    | -                                  | -                  | -                                   |              |
| Amphimedon queenslandica                  | -         | -                             | -                                       | A                                  | A                                    | -                                  | -                  | -                                   |              |
| Spongilla lacustris                       | -         | -                             | -                                       | A                                  | A                                    | -                                  | -                  | -                                   |              |
| Latrunculia apicalis                      | -         | -                             | -                                       | A                                  | A                                    | -                                  | -                  | -                                   |              |
| Sycon coactum                             | -         | -                             | -                                       | A                                  | A                                    | -                                  | -                  | -                                   |              |

Body Plan: P = Platyctenid, N = Nuda, C = Cydippida, L = Lobata, R = Ribbon

Feeding Mode: T = Tentacles, L = Lobes, E = Engulfing

| Taxon                                    | NCBI Accession or other source |
|------------------------------------------|--------------------------------|
| Pleurobrachia_pileus                     | AF293678                       |
| Pleurobrachia_bachei                     | AF293677                       |
| Hormiphora_plumosa                       | AF293676                       |
| Hormiphora_sp                            | AF100944                       |
| Euplokamis_sp                            | HE647719.2                     |
| Mertensia_ovum                           | FJ686937                       |
| Mertensia_ovum                           | AF293679                       |
| Haeckelia_beehleri                       | AF293673                       |
| Haeckelia_rubra                          | AF293674                       |
| Ctenophora_sp1_Podar_et_al_2001          | AF293676                       |
| Ctenophora_sp2_Podar_et_al_2001          | AF293680                       |
| Ctenophora_sp3_Podar_et_al_2001          | AF293681                       |
| Beroe_forskali                           | AF293697                       |
| Beroe_forskali                           | AF293698                       |
| Beroe_cucumis                            | AF293695                       |
| Beroe_cucumis                            | AF293699                       |
| Beroe_cucumis                            | D15066                         |
| Beroe_ovata                              | AF293694                       |
| Beroe_gracilis                           | AF293696                       |
| Beroe_abyscicola                         | JN673817                       |
| Coeloplana_bocki                         | HQ435813                       |
| Coeloplana_anthostella                   | HQ435810                       |
| Vallicula_multiformis                    | AF293684                       |
| Lampocteis_cruentiventer                 | KF202290                       |
| Bolinopsis_infundibulum                  | AF293687                       |
| Leucothea_pulchra                        | AF293688                       |
| Ocyropsis_maculata                       | AF293689                       |
| Ocyropsis_crystallina_crystallina        | AF293690                       |
| Ocyropsis_crystallina_guttata            | AF293691                       |
| Ctenophora_sp4_Podar_et_al_2001          | AF293686                       |
| Cestum_veneris                           | AF293692                       |
| Velamen_paralleum                        | AF293693                       |
| Thalassocalyce_inconstans                | AF293685                       |
| Mnemiopsis_leidy                         | AF293700                       |
| Coeloplana_aginae                        | AF358112                       |
| Charistephane_fugiens                    | AF293682                       |
| Charistephane_fugiens                    | AF358113                       |
| Coeloplana_bannwarthii                   | AF293683                       |
| Deiopea_kaloktenota_Simion_et_al_2014    | KJ754160                       |
| Lampea_pancerina_Simion_et_al_2014       | KJ754155                       |
| Pleurobrachia_brunnea_Simion_et_al_2014  | KJ754154                       |
| Cestum_veneris_Simion_et_al_2014         | KJ754161                       |
| Pleurobrachia_pileus_Simion_et_al_2014   | KJ754153                       |
| Mnemiopsis_leidy_Simion_et_al_2014       | KJ754158                       |
| Coeloplana_ct_meteoris_Simion_et_al_2014 | KJ754157                       |
| Beroe_forskali_Simion_et_al_2014         | KJ754156.1                     |
| Leucothea_multicornis_Simion_et_al_2014  | KJ754159                       |
| Pleurobrachia_sp_Moroz_et_al_2015        | MF599304                       |
| Vallicula_multiformis_Moroz_et_al_2015   | MF599305                       |
| Bolinopsis_infundibulum_Moroz_et_al_2015 | MF599306                       |
| Euplokamis_dunlapae_Moroz_et_al_2015     | MF599307                       |
| Mertensidae_sp_FHL_Moroz_et_al_2015      | MF599308                       |
| Coeloplana_astericola_Moroz_et_al_2015   | MF599309                       |
| Beroe_abyscicola_Moroz_et_al_2015        | MF599310                       |
| Dryodora_glandiformis_Moroz_et_al_2015   | MF599311                       |
| Hormiphora_palmata                       | MF599312                       |
| Pleurobrachia_pileus                     | MF599313                       |
| Lobolampaea_tetragona                    | MF599314                       |
| Beroe_sp_Antarctica                      | MF599315                       |
| Beroe_sp_Queensland_Australia            | MF599316                       |
| Beroe_gracilis                           | MF599317                       |
| Beroe_ovata                              | MF599318                       |
| Bolinopsis_ashleyi                       | MF599319                       |
| Ctenophora_sp_Florida_USA                | MF599320                       |
| Mertensidae_sp_Antarctica                | MF599321                       |
| Pukia_falcata                            | MF599322                       |
| Ctenophora_sp_Bahamas                    | MF599323                       |
| Lobata_sp_Punta_Arenas_Chile             | MF599324                       |
| Cestum_veneris                           | MF599325                       |
| Pleurobrachiidae_sp_Gulf_of_Mexico       | MF599326                       |
| Ocyropsis_sp                             | MF599327                       |
| Hormiphora_californiensis                | MF599328                       |
| Ocyropsis_sp_Florida_USA                 | MF599329                       |
| Mnemiopsis_mccradyi                      | MF599330                       |
| Mnemiopsis_sp_New_Jersey_USA             | MF599331                       |
| Ocyropsis_crystallina                    | MF599332                       |
| Callianira_antarctica                    | MF599333                       |
| Pleurobrachia_sp_1_South_Carolina_USA    | MF599334                       |
| Pleurobrachia_sp_2_South_Carolina_USA    | MF599335                       |
| Cyppipida_sp_Maryland                    | MF599336                       |
| AEGINA                                   | Mallatt et al. 2010            |
| AGLAUROPSIS                              | Mallatt et al. 2010            |
| AMBYSTOMA                                | Mallatt et al. 2010            |
| AMPHITRITE                               | Mallatt et al. 2010            |
| ANEMONIA                                 | Mallatt et al. 2010            |
| ANTIPATHES                               | Mallatt et al. 2010            |
| ARION                                    | Mallatt et al. 2010            |
| ATOLLA                                   | Mallatt et al. 2010            |
| AXINELLA                                 | Mallatt et al. 2010            |
| CALLIBAETIS                              | Mallatt et al. 2010            |
| CALLIPALLENE                             | Mallatt et al. 2010            |
| CARYBDEA                                 | Mallatt et al. 2010            |
| CATOSTYLUS                               | Mallatt et al. 2010            |
| CEREBRATULUS                             | Mallatt et al. 2010            |
| CHAETOPLEURA                             | Mallatt et al. 2010            |
| CHRYSAORA                                | Mallatt et al. 2010            |
| CLYTHIA                                  | Mallatt et al. 2010            |
| CRATEROMORPHA                            | Mallatt et al. 2010            |
| CYANEA                                   | Mallatt et al. 2010            |
| EPHYDRIA                                 | Mallatt et al. 2010            |
| FABIENNA                                 | Mallatt et al. 2010            |
| GLYCERA                                  | Mallatt et al. 2010            |
| HALICLYSTUS                              | Mallatt et al. 2010            |
| HOMARUS                                  | Mallatt et al. 2010            |
| HYDRA                                    | Mallatt et al. 2010            |
| HYDRACTINIA                              | Mallatt et al. 2010            |
| ICHTHYOPHONUS                            | Mallatt et al. 2010            |
| LUBOMIRSKIA                              | Mallatt et al. 2010            |
| MELICERTISSA                             | Mallatt et al. 2010            |
| METRIDIUM                                | Mallatt et al. 2010            |
| MISUMENOPS                               | Mallatt et al. 2010            |
| MONOSIGA                                 | Mallatt et al. 2010            |
| MONOSIGAOVATA                            | Mallatt et al. 2010            |
| MONTASTREA                               | Mallatt et al. 2010            |
| MUCOR                                    | Mallatt et al. 2010            |
| MYCALE                                   | Mallatt et al. 2010            |
| NAUSITHOE                                | Mallatt et al. 2010            |
| NECTOPYRAMIS                             | Mallatt et al. 2010            |
| NEMATOSTELLA                             | Mallatt et al. 2010            |
| OOPSACAS                                 | Mallatt et al. 2010            |
| OSCARELLA                                | Mallatt et al. 2010            |
| PACHYDICTYUM                             | Mallatt et al. 2010            |
| PANTACHOGON                              | Mallatt et al. 2010            |
| PETROMYZON                               | Mallatt et al. 2010            |
| PHORONIS                                 | Mallatt et al. 2010            |
| PODOCORYNE                               | Mallatt et al. 2010            |
| PODURA                                   | Mallatt et al. 2010            |
| PORPITA                                  | Mallatt et al. 2010            |
| PROTEROSPONGIA                           | Mallatt et al. 2010            |
| RAJA                                     | Mallatt et al. 2010            |
| RHABDOCALYPTUS                           | Mallatt et al. 2010            |
| RHIZAXINELLA                             | Mallatt et al. 2010            |
| SACCHAROMYCES                            | Mallatt et al. 2010            |
| SACCOCLOSSUS                             | Mallatt et al. 2010            |
| SALPINGOCEGA                             | Mallatt et al. 2010            |
| SCRIPPSIA                                | Mallatt et al. 2010            |
| SCUTIGERA                                | Mallatt et al. 2010            |
| STRONGYLOCENTROTUS                       | Mallatt et al. 2010            |
| TENEBRIO                                 | Mallatt et al. 2010            |
| TETHYA                                   | Mallatt et al. 2010            |
| TRACHYCLADUS                             | Mallatt et al. 2010            |
| TRICHOPLAX                               | Mallatt et al. 2010            |
| TRIOPS                                   | Mallatt et al. 2010            |
| AMPHIMEDON                               | Mallatt et al. 2010            |
| SUBERITES                                | Mallatt et al. 2010            |
| SYCON                                    | Mallatt et al. 2010            |
| HETEROCHONE                              | Mallatt et al. 2010            |
| LEUCETTA                                 | Mallatt et al. 2010            |
| LEUCOSOLENIA                             | Mallatt et al. 2010            |

1 Figure S1: Phylogeny inferred with RAxML and dataset Metazoan\_full. Nodes have 100% BS unless  
 2 otherwise noted.

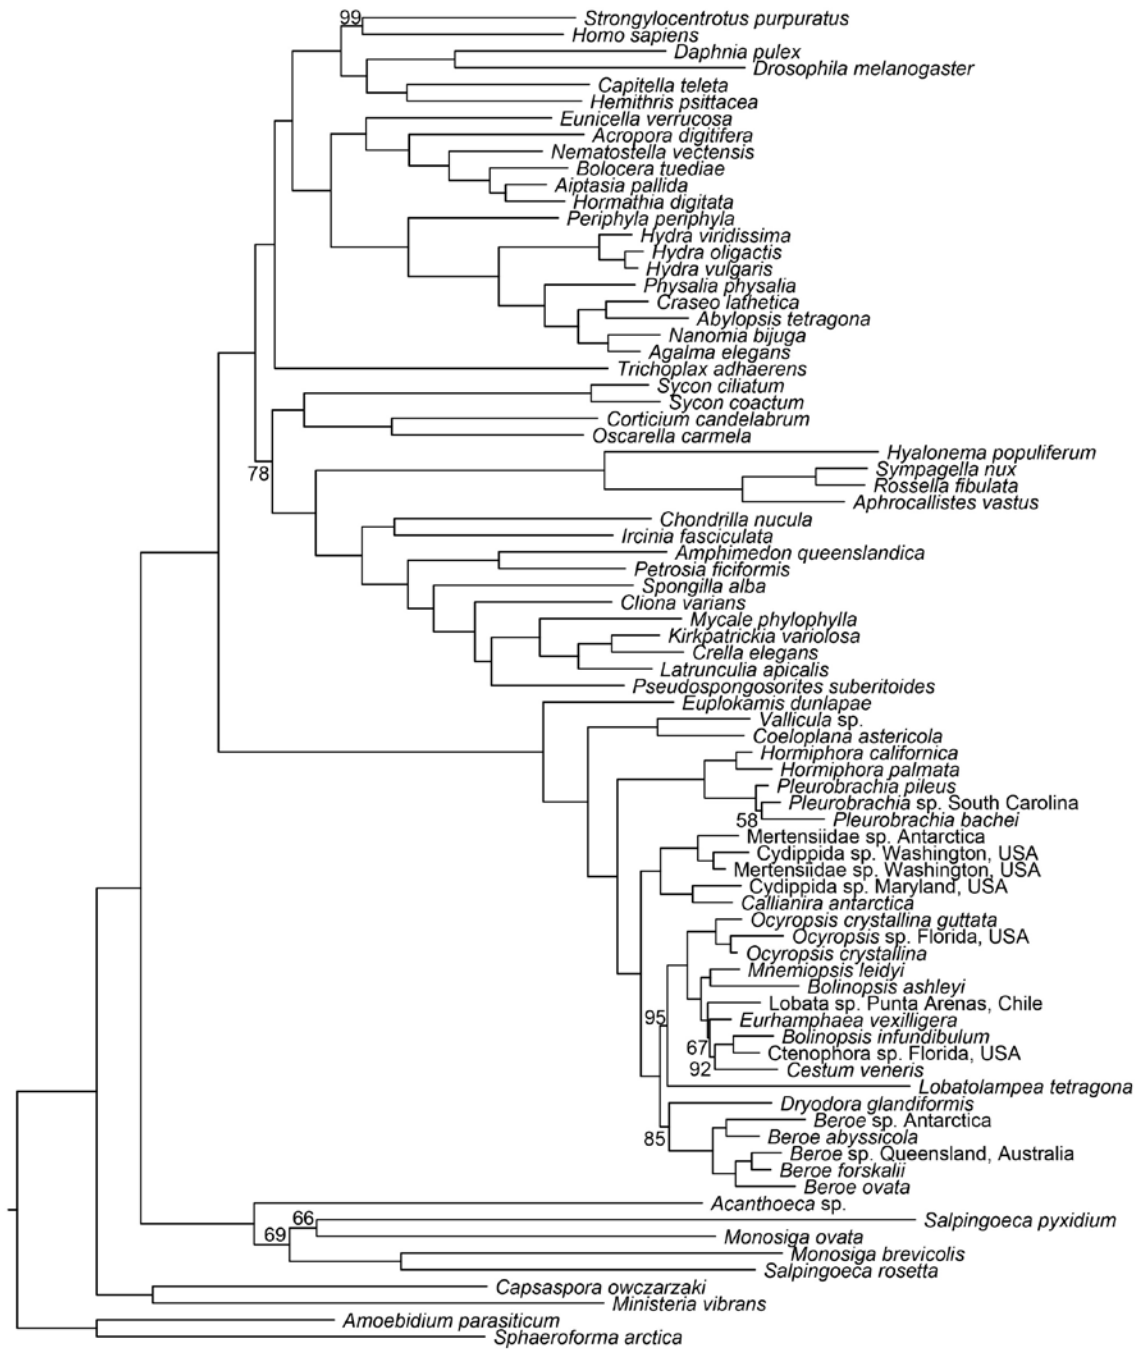

3  
 4  
 5

0.3



6 Figure S2: Phylogeny inferred with RAxML and dataset Metazoan\_LB\_strict. Nodes have 100% BS unless  
 7 otherwise noted.

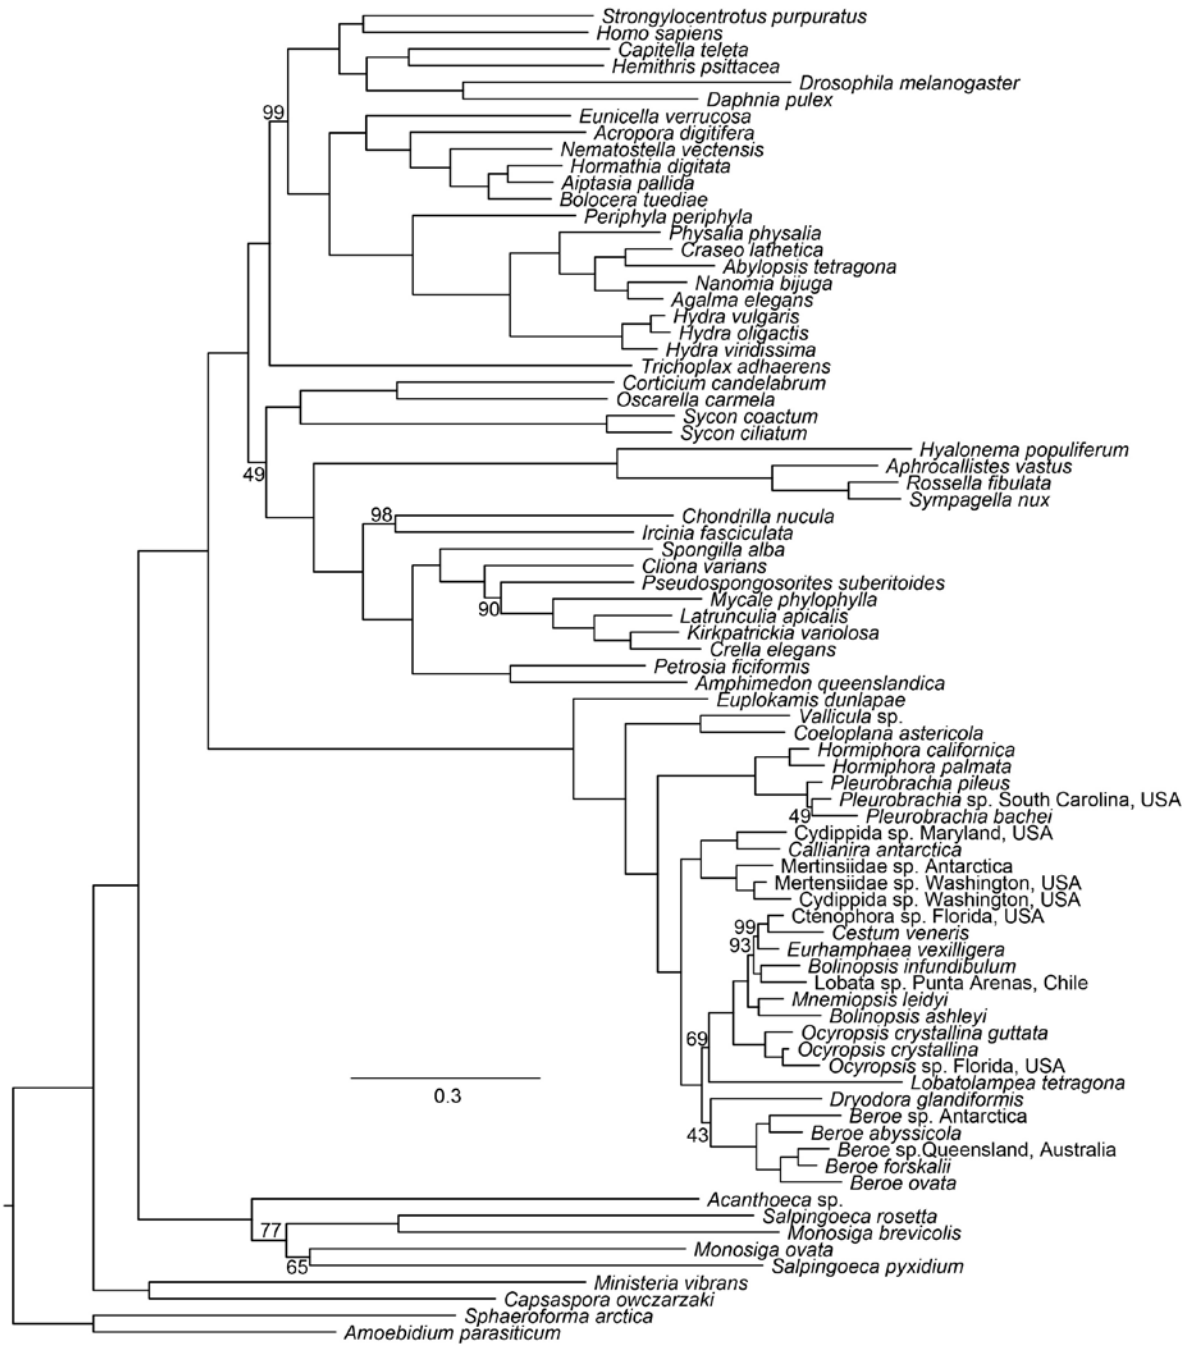

8

9

10

11 Figure S3: Phylogeny inferred with RAxML and dataset Metazoan\_LB\_relaxed. Nodes have 100% BS  
 12 unless otherwise noted.

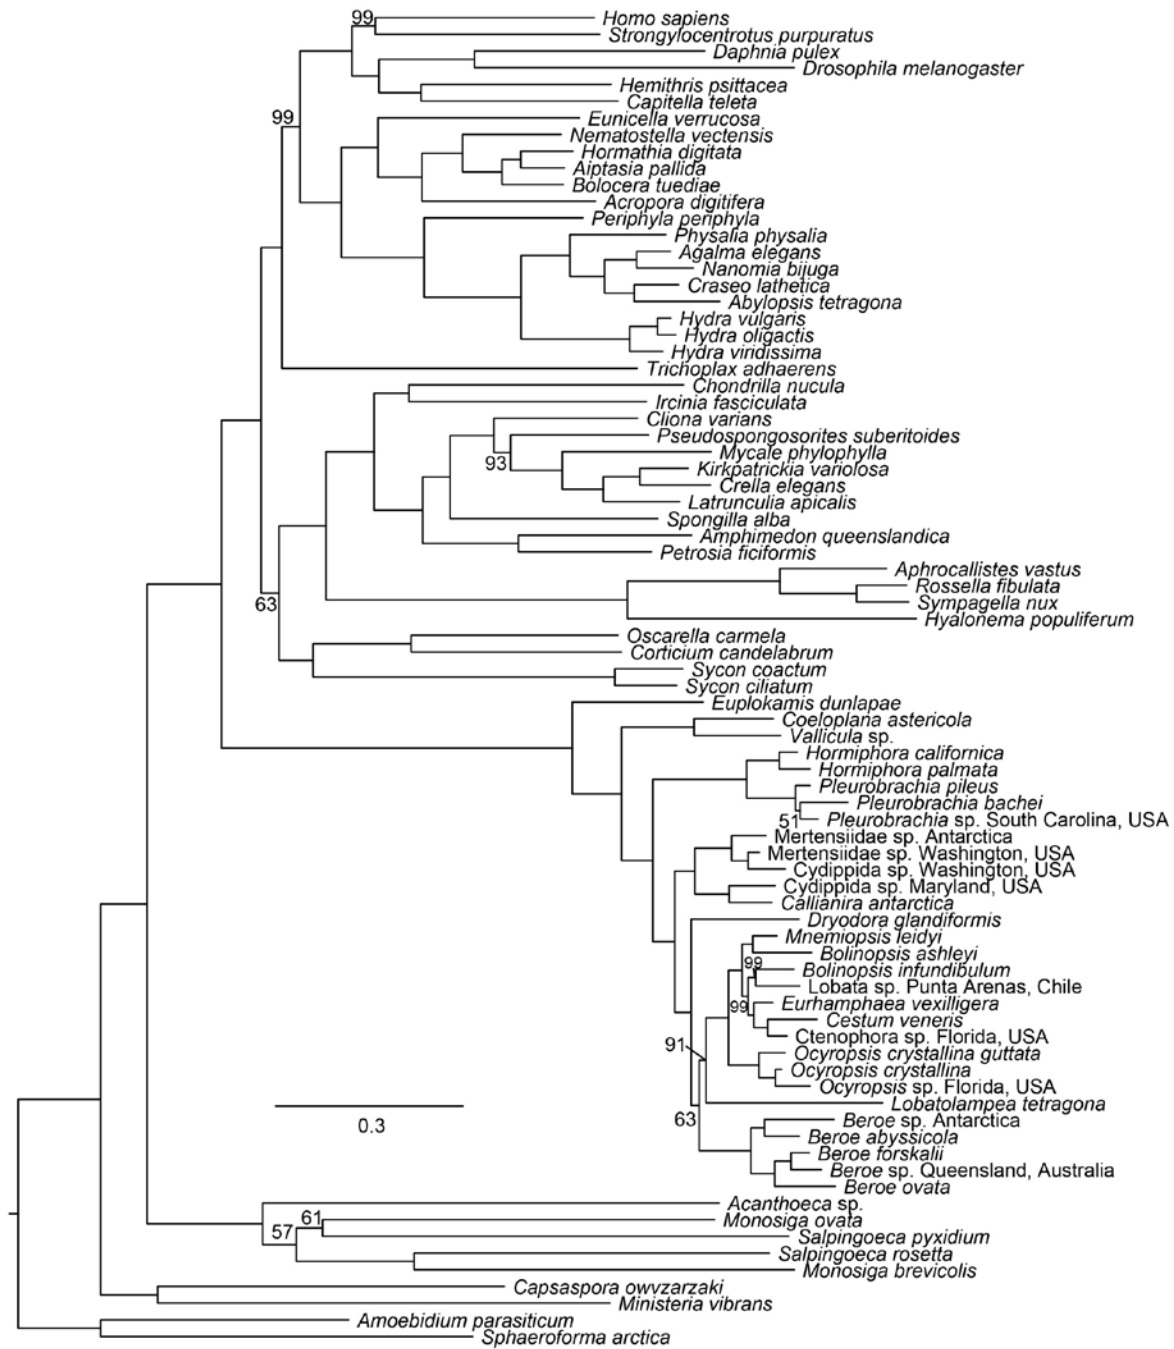

13  
 14  
 15

16 Figure S4: Phylogeny inferred with RAxML and dataset Metazoan\_RCFV\_strict. Nodes have 100% BS  
 17 unless otherwise noted.

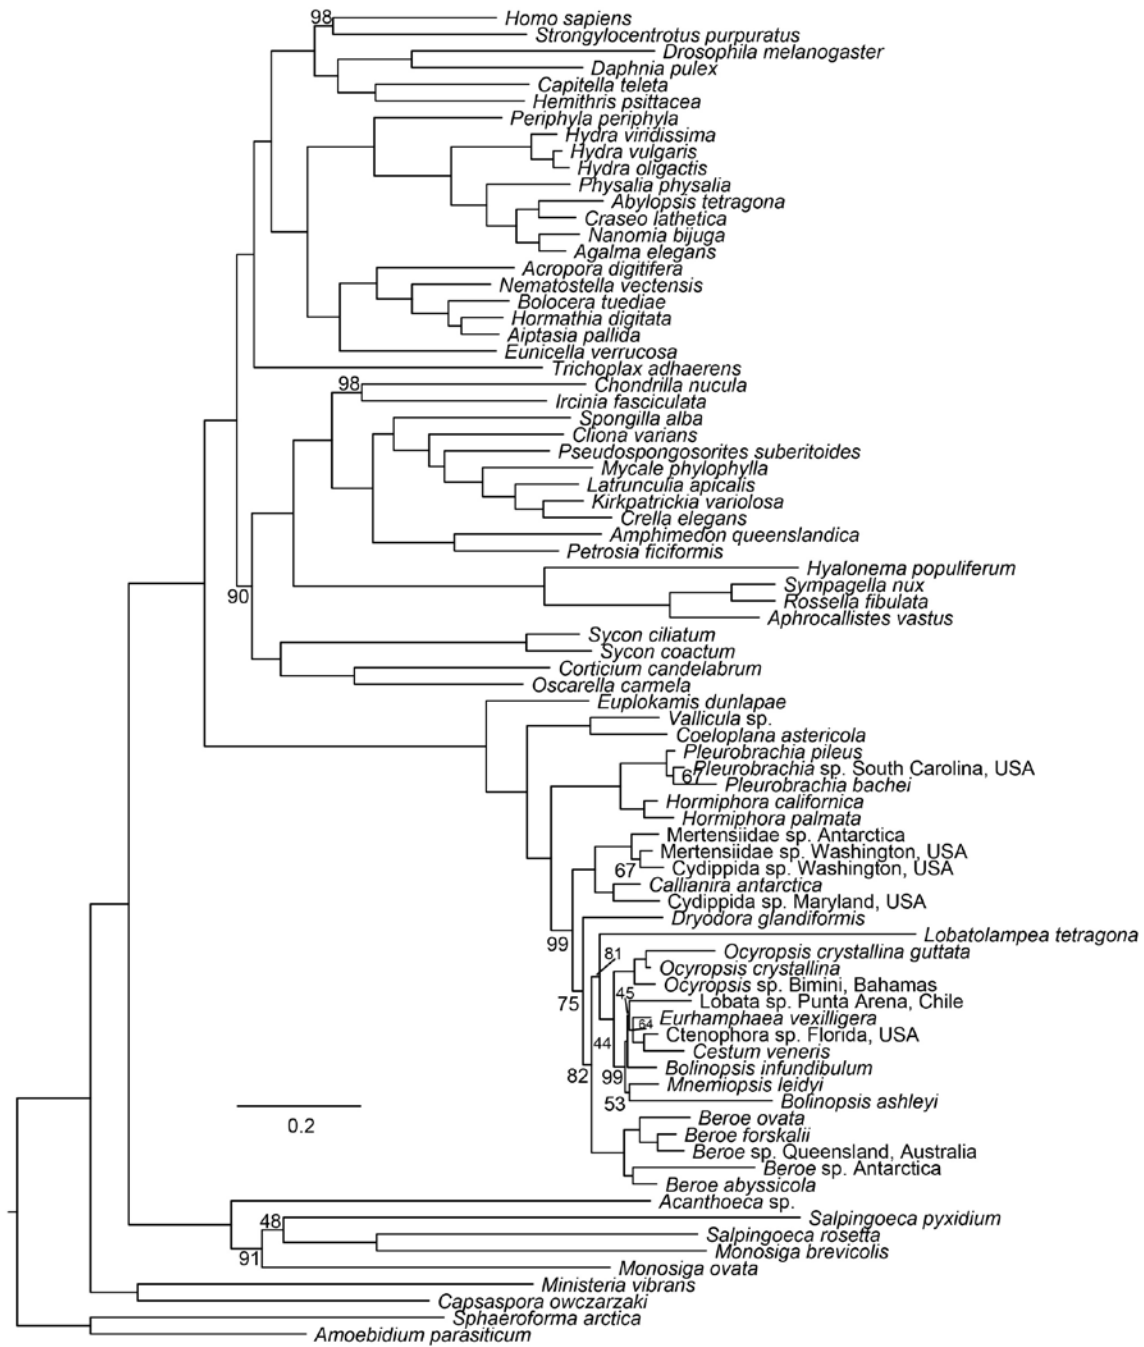

18

19

20

21 Figure S5: Phylogeny inferred with RAxML and dataset Metazoan\_RCFV\_relaxed. Nodes have 100% BS  
 22 unless otherwise noted.

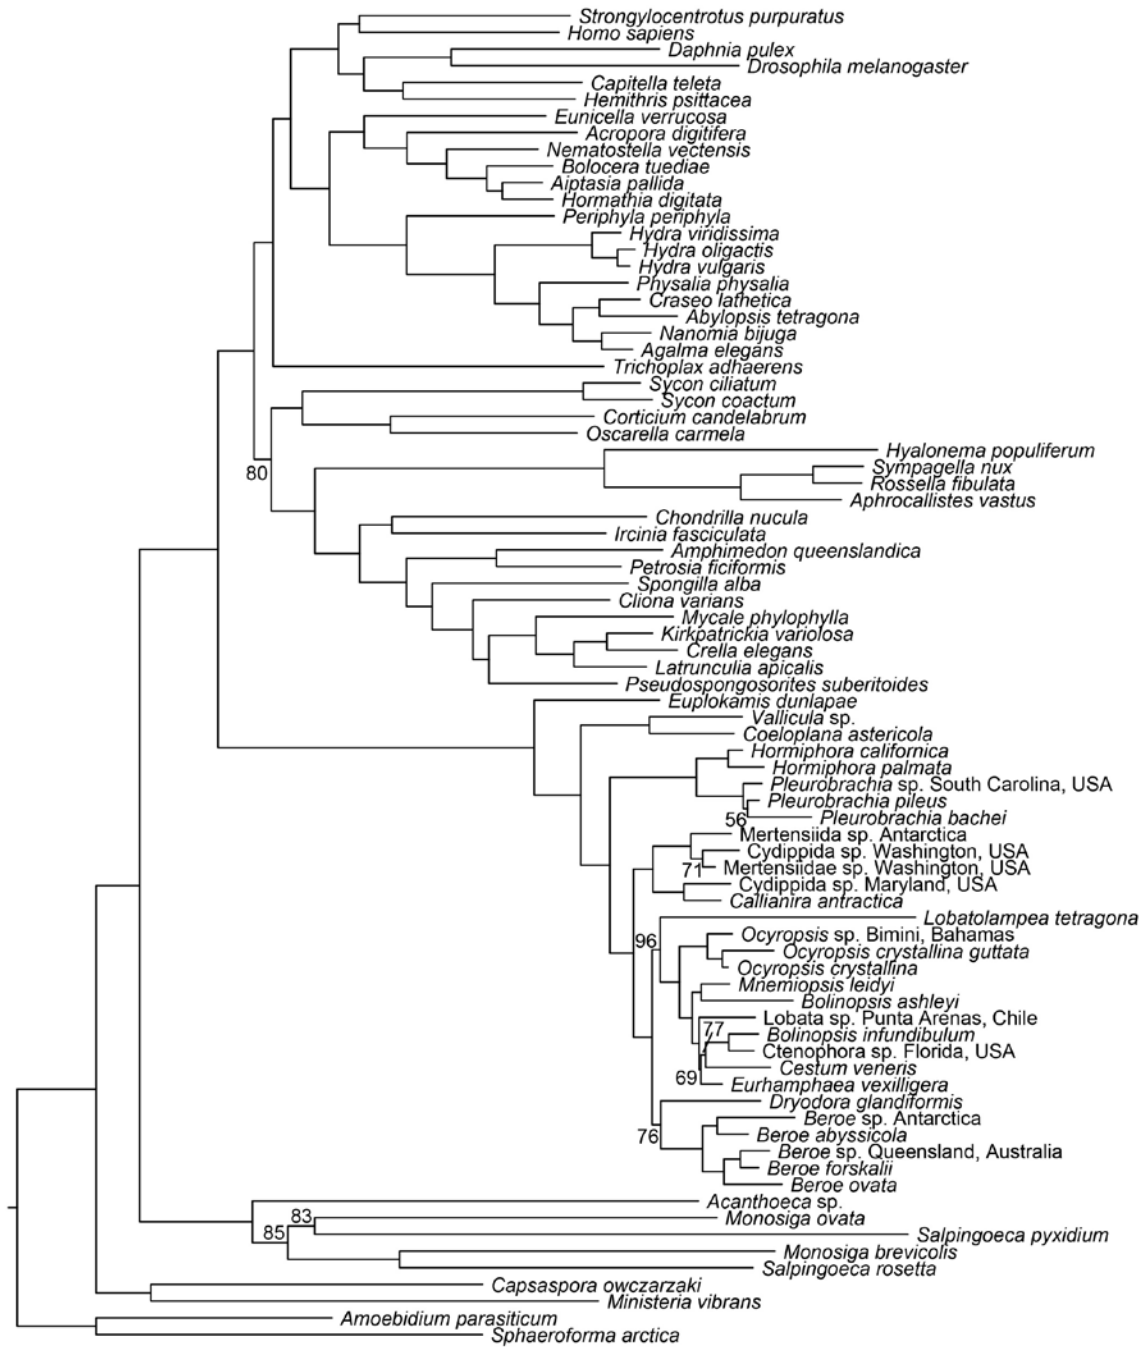

23  
 24  
 25

0.3

26 Figure S6: Phylogeny inferred with RAxML and dataset Metazoan\_RCFV\_LB\_strict. Nodes have 100% BS  
 27 unless otherwise noted.

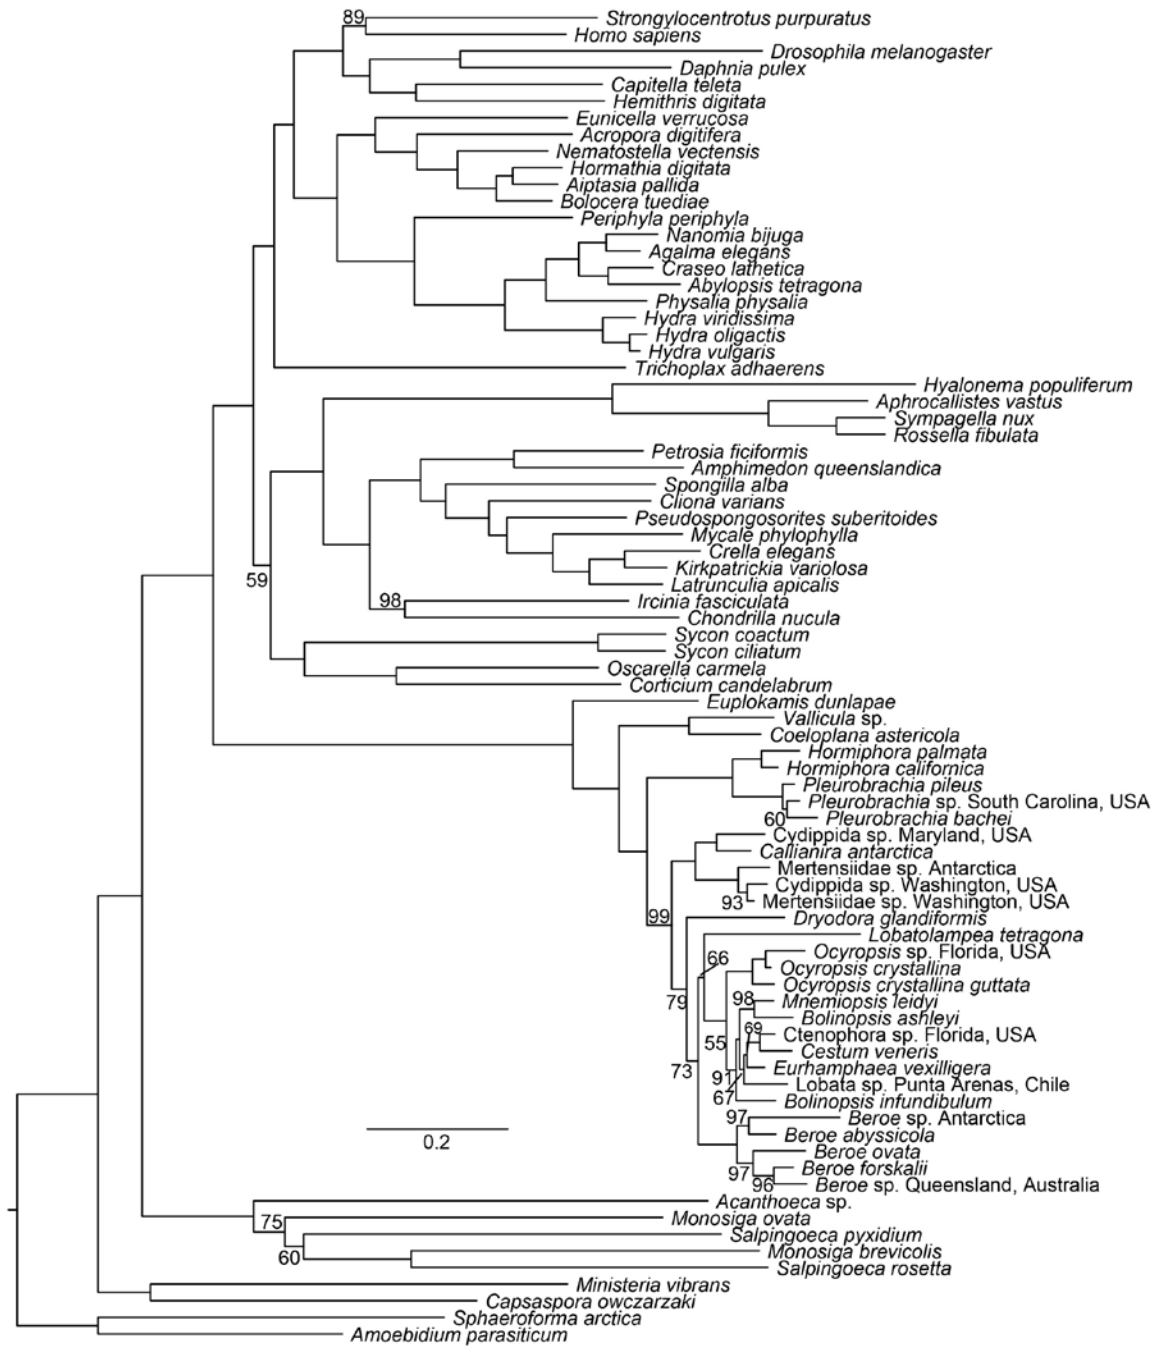

28  
 29  
 30

31 Figure S7: Phylogeny inferred with RAxML and dataset Metazoan\_RCFV\_LB\_relaxed. Nodes have 100%  
 32 BS unless otherwise noted.

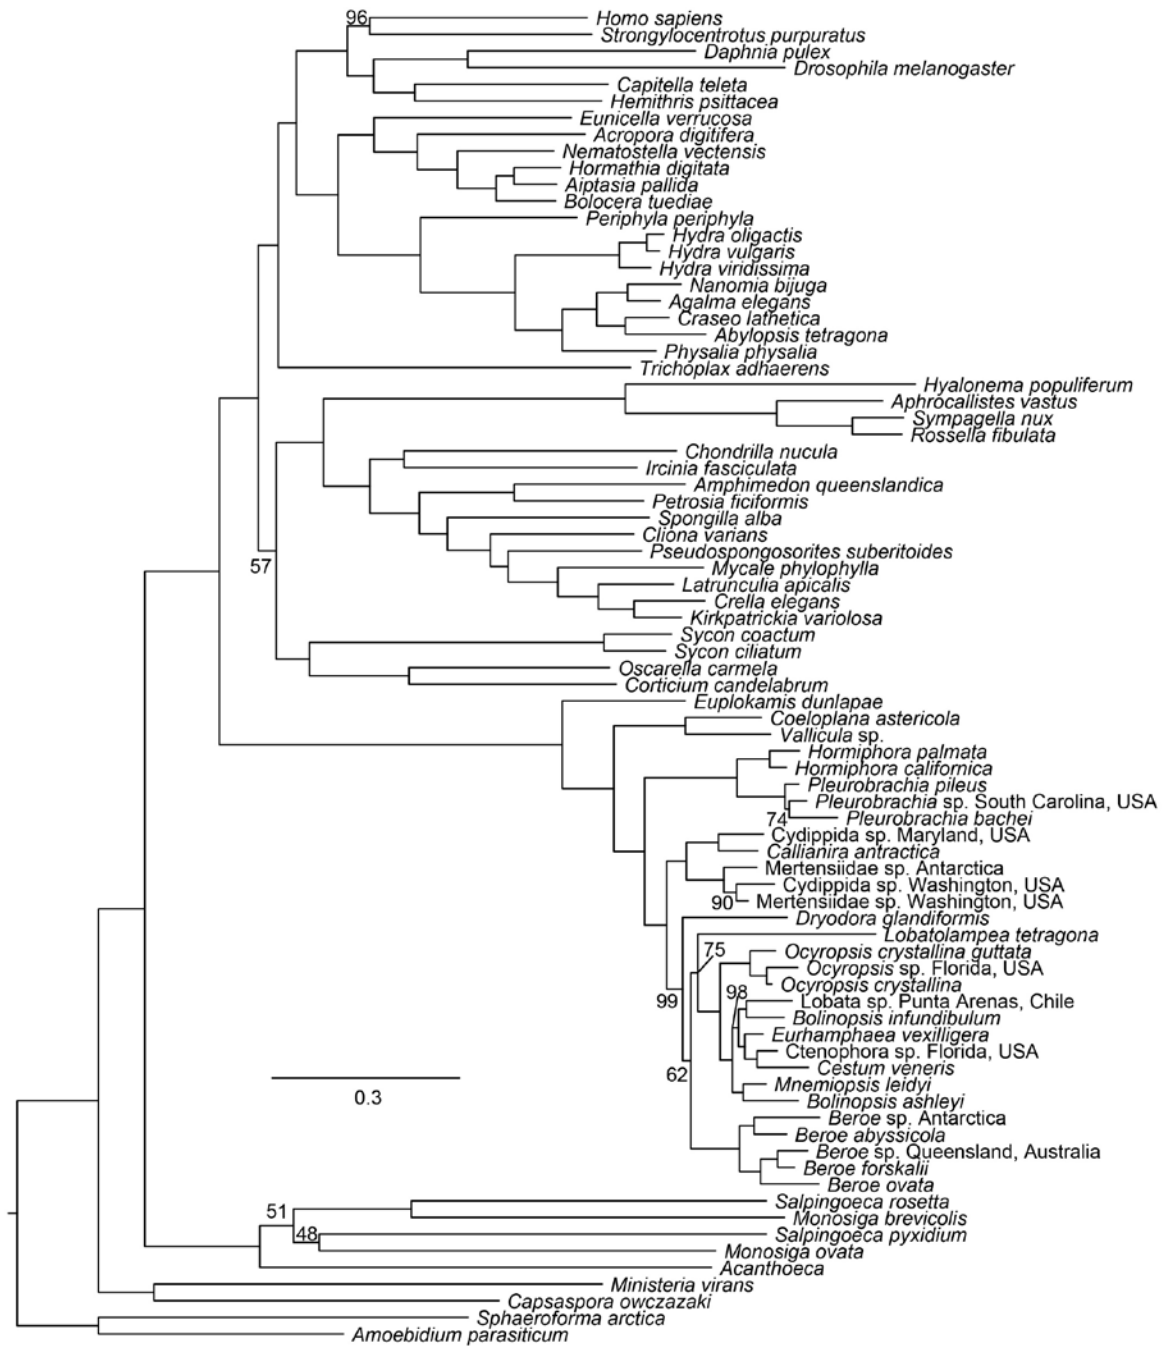

33  
 34  
 35

36 Figure S8: Phylogeny inferred with RAxML and dataset Metazoan\_Choano. Nodes have 100% BS unless  
 37 otherwise noted.

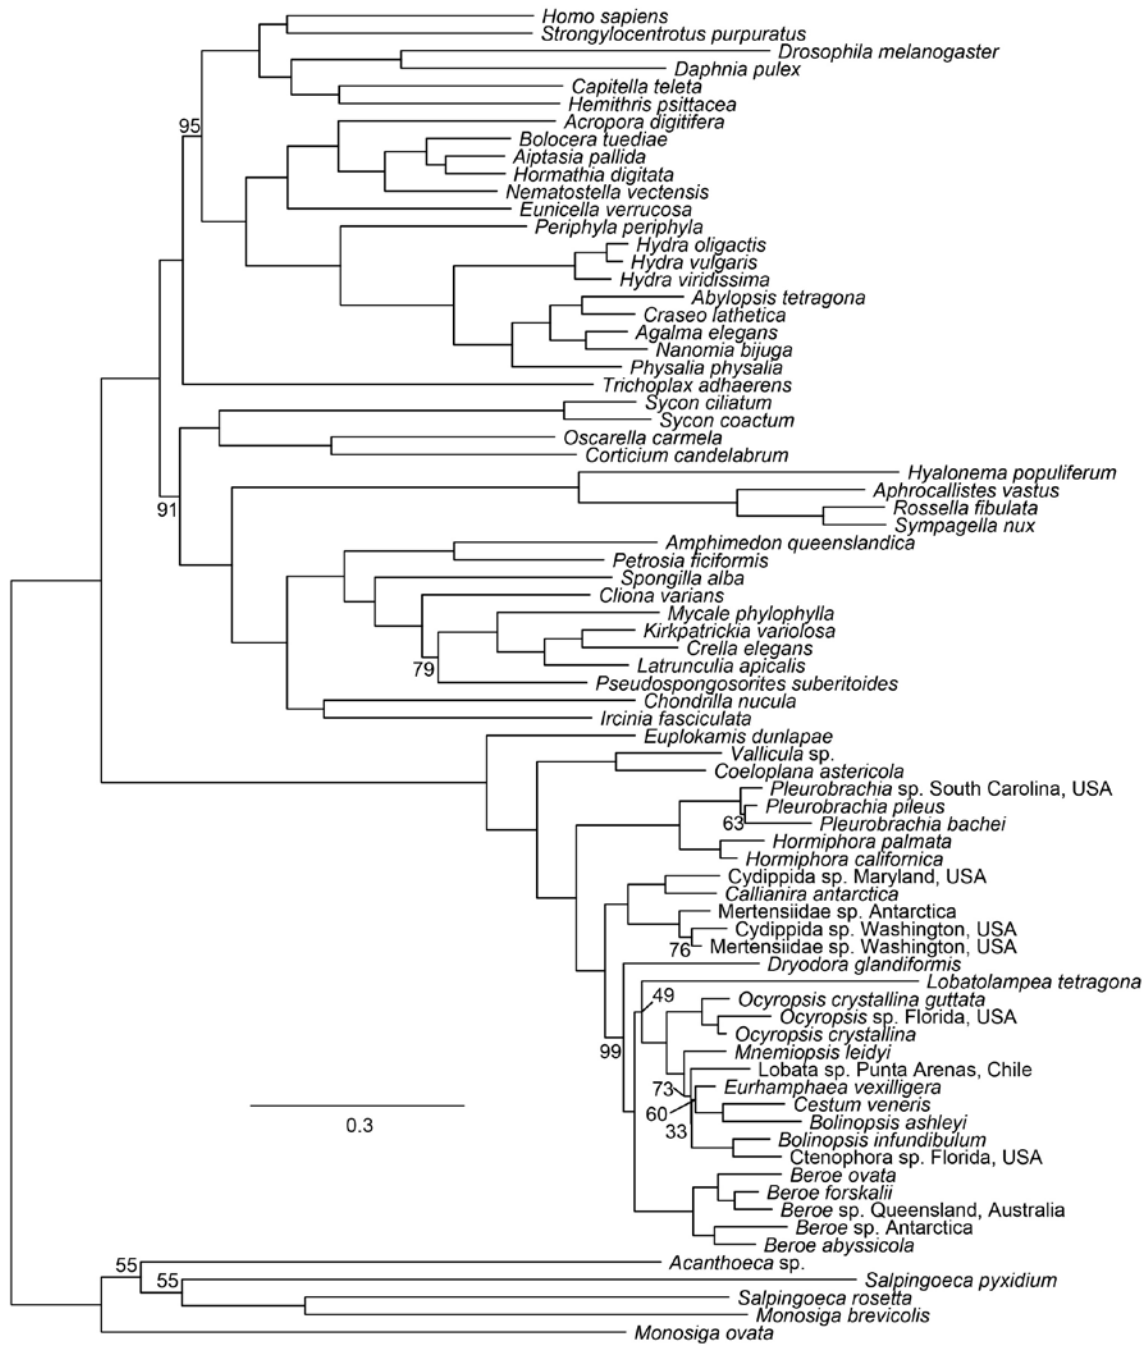

38

39

40

41 Figure S9: Phylogeny inferred with RAxML and dataset Metazoan\_Choano\_LB\_strict. Nodes have 100%  
 42 BS unless otherwise noted.

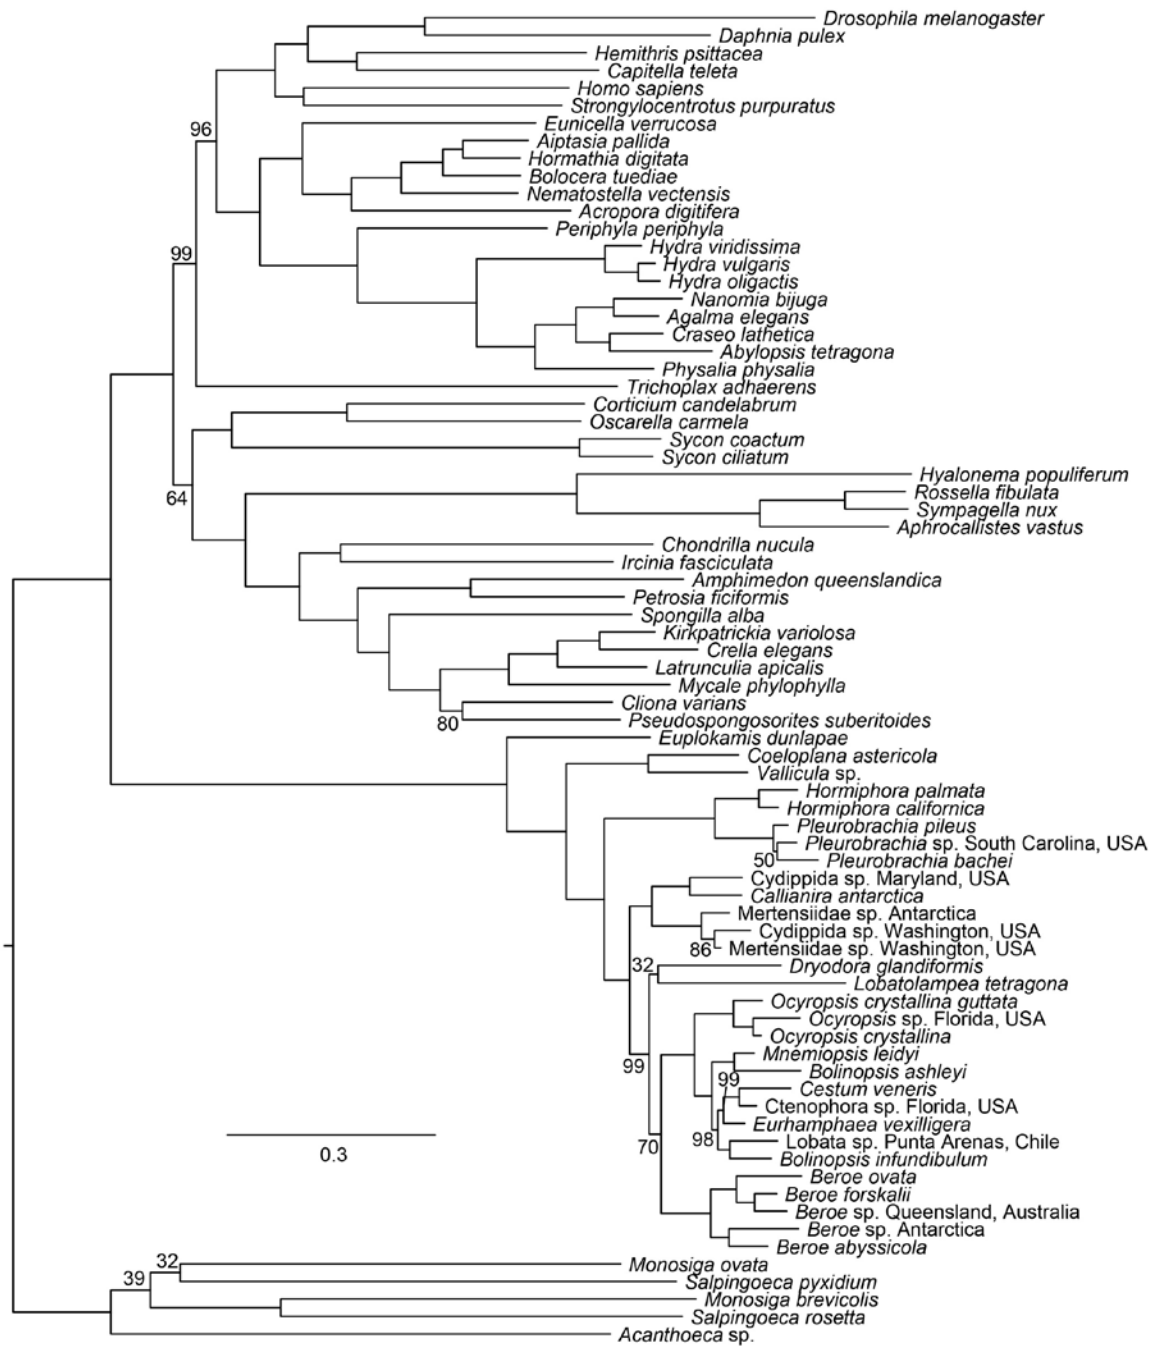

43  
 44  
 45



46 Figure S10: Phylogeny inferred with RAxML and dataset Metazoan\_Choano\_LB\_relaxed. Nodes have  
 47 100% BS unless otherwise noted.

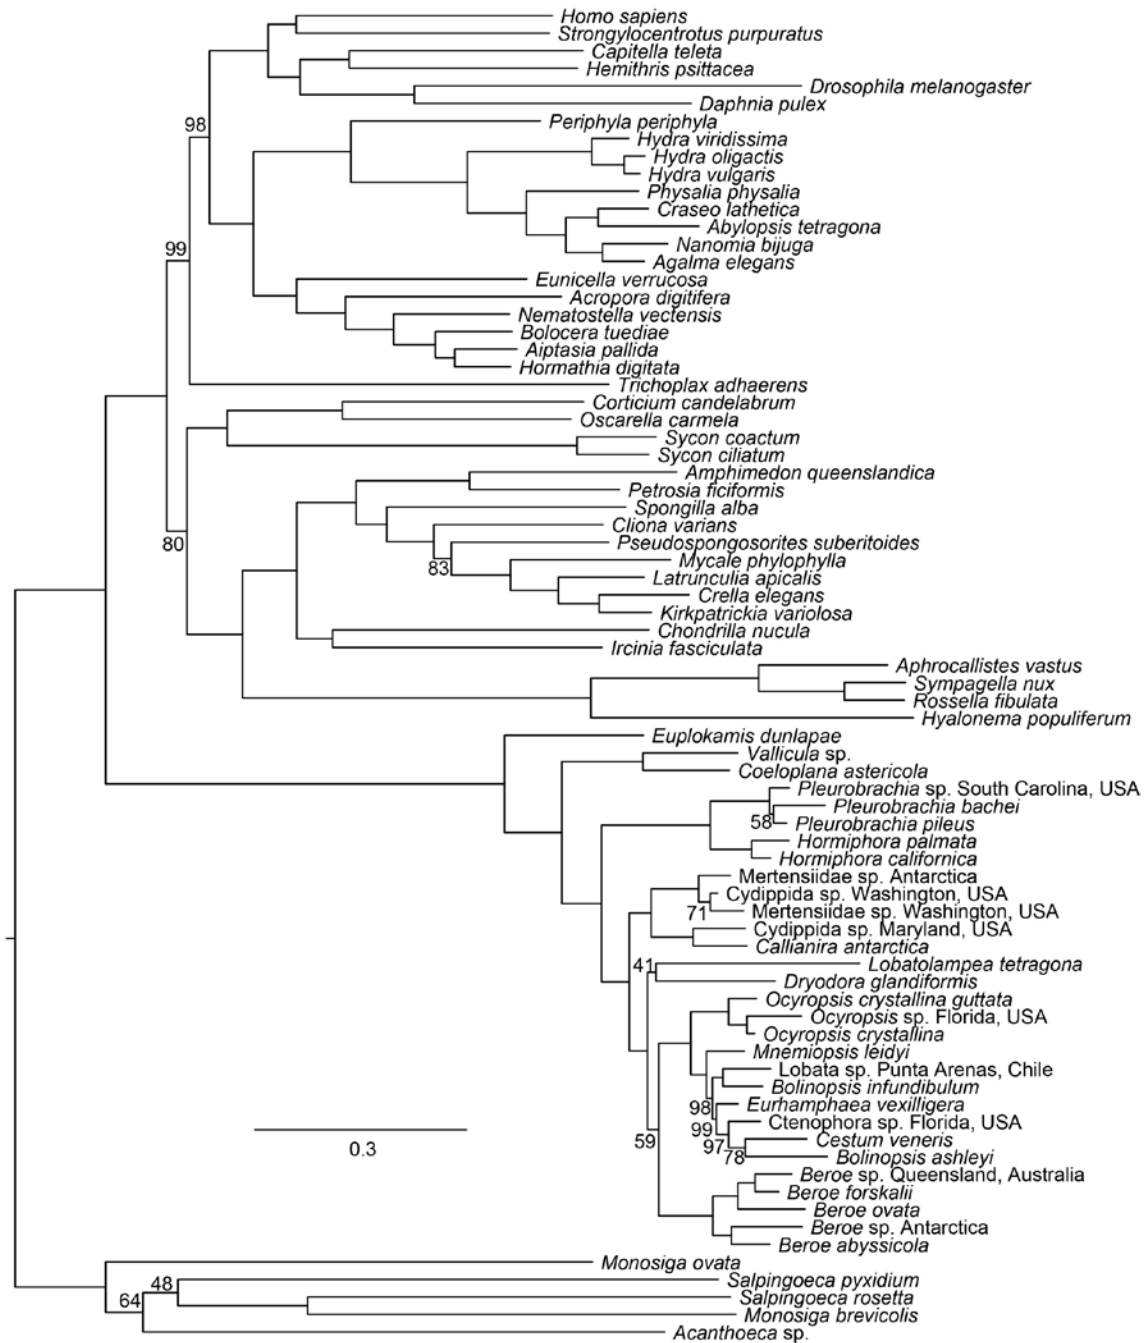

48  
 49  
 50

51 Figure S11: Phylogeny inferred with RAxML and dataset Metazoan\_Choano\_RCFV\_strict. Nodes have  
 52 100% BS unless otherwise noted.

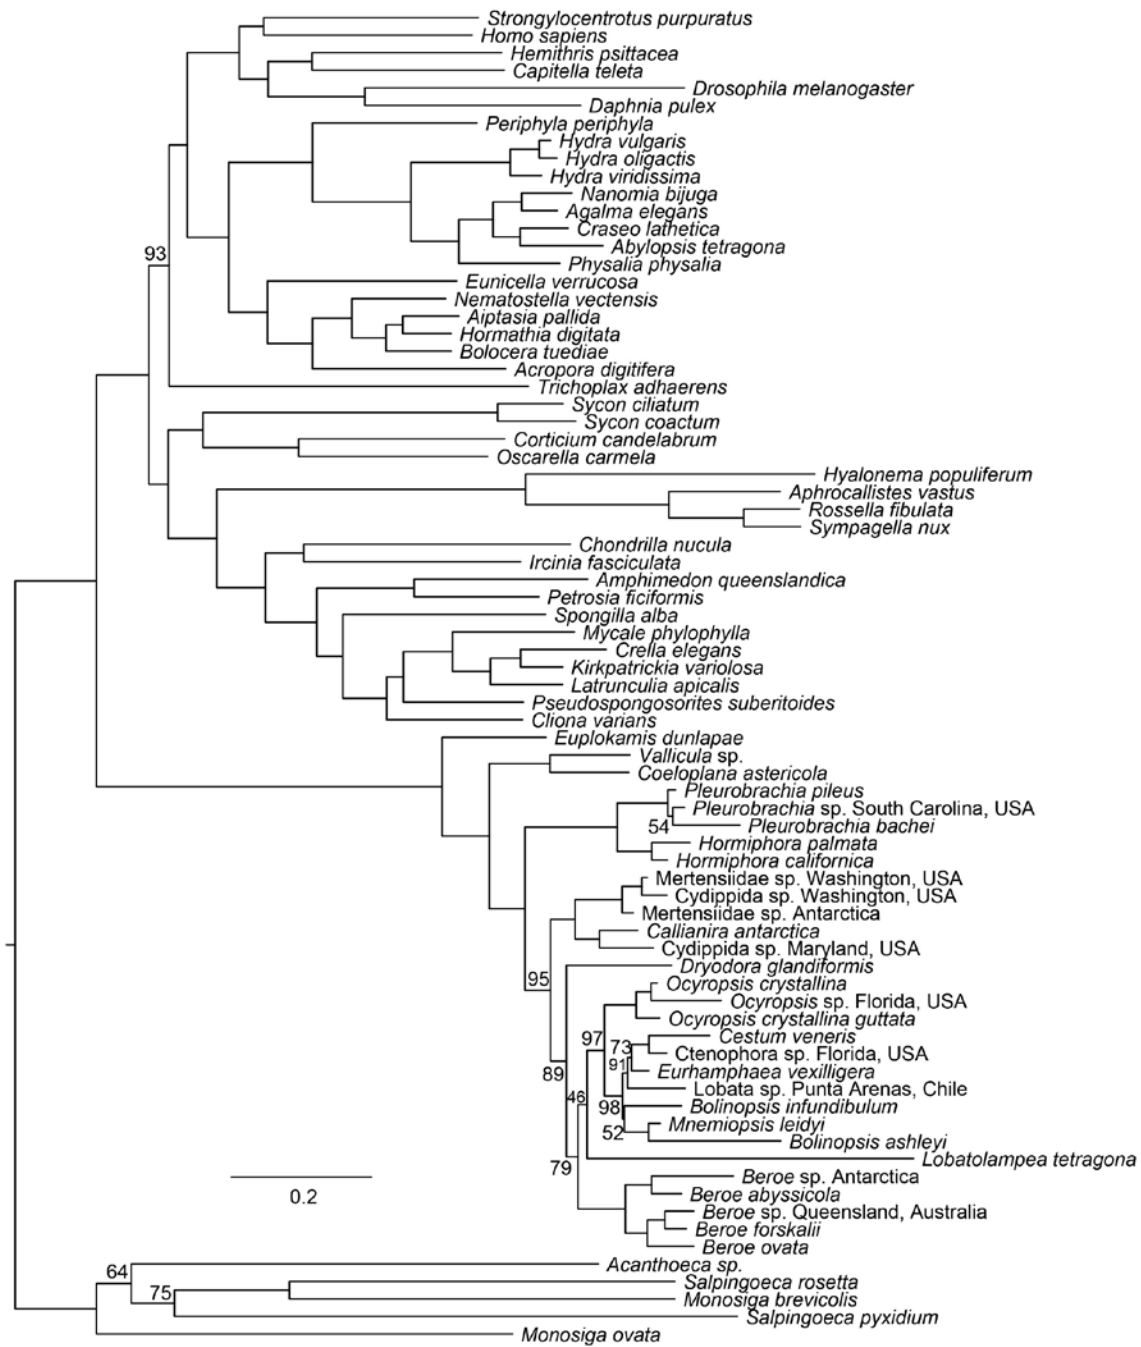

53

54

55

56 Figure S12: Phylogeny inferred with RAxML and dataset Metazoan\_Choano\_RCFV\_relaxed. Nodes have  
 57 100% BS unless otherwise noted.

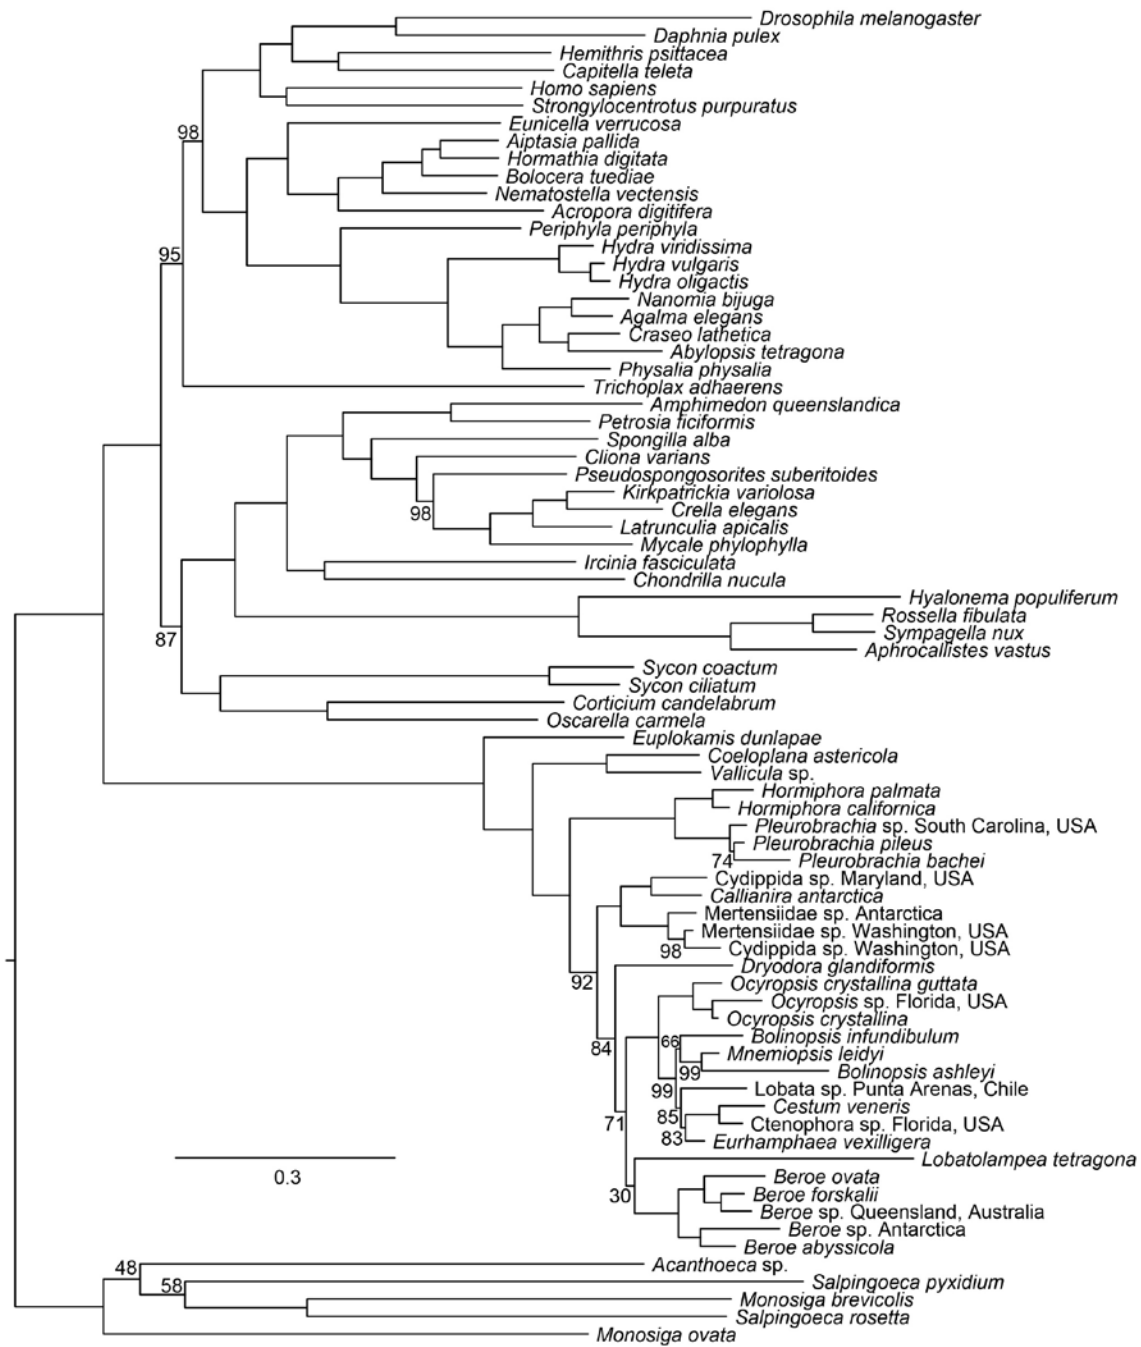

58

59

60

61 Figure S13: Phylogeny inferred with RAxML and dataset Metazoan\_Choano\_LB\_RCFV\_strict. Nodes have  
 62 100% BS unless otherwise noted.

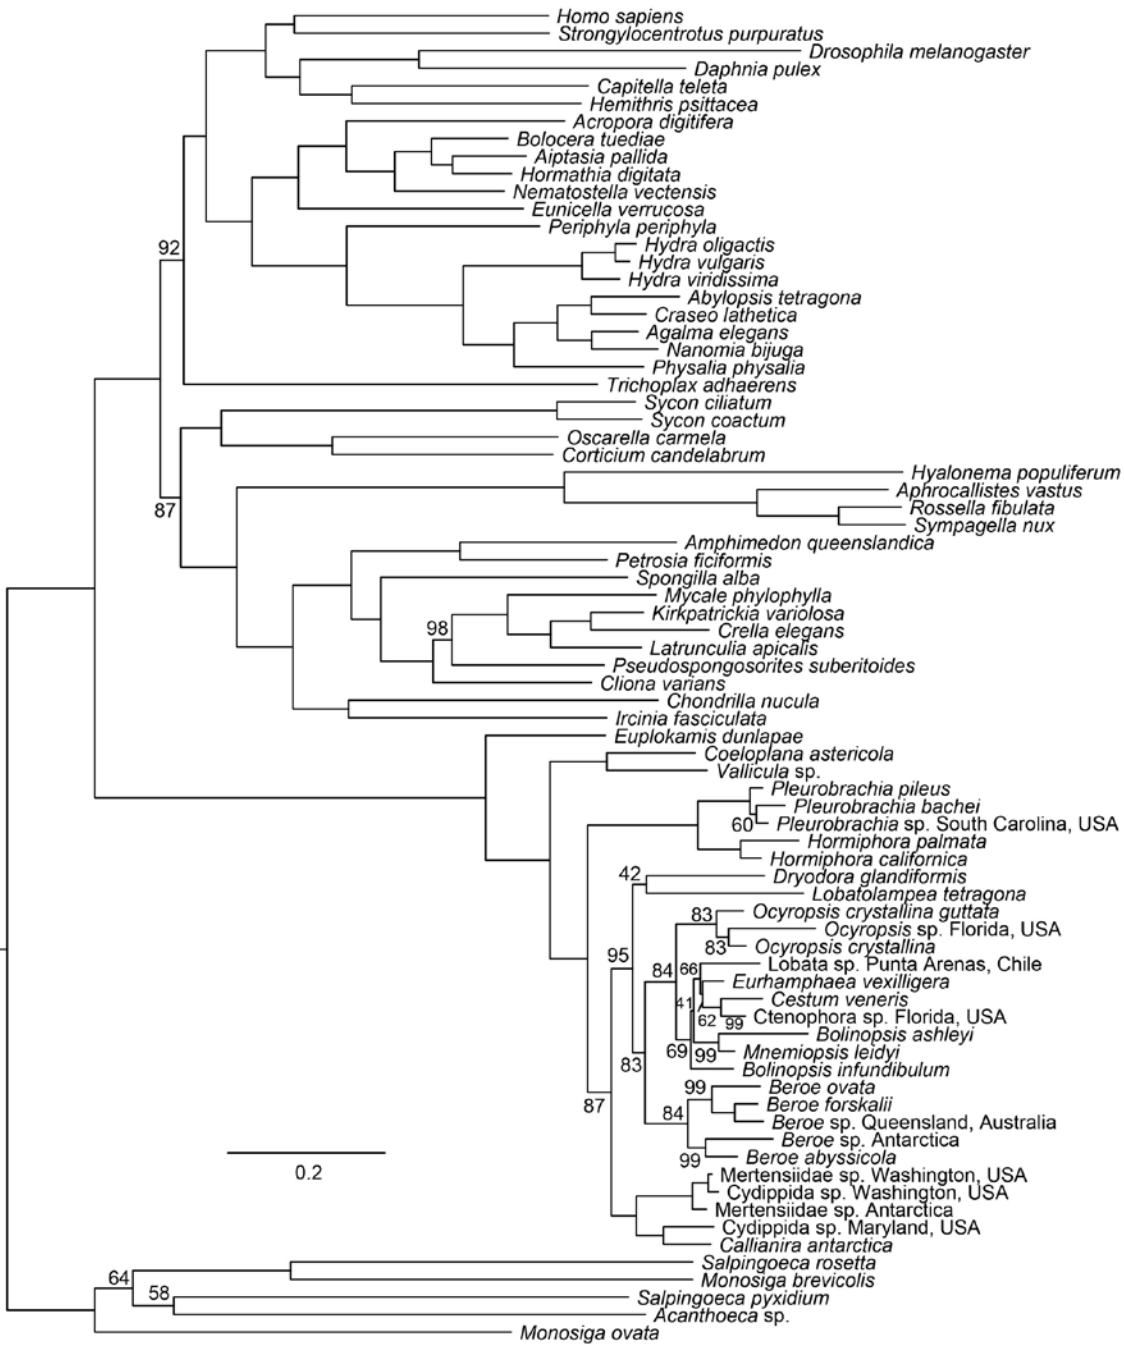

63  
 64  
 65

66 Figure S14: Phylogeny inferred with RAxML and dataset Metazoan\_Choano\_LB\_RCFV\_relaxed. Nodes  
 67 have 100% BS unless otherwise noted.

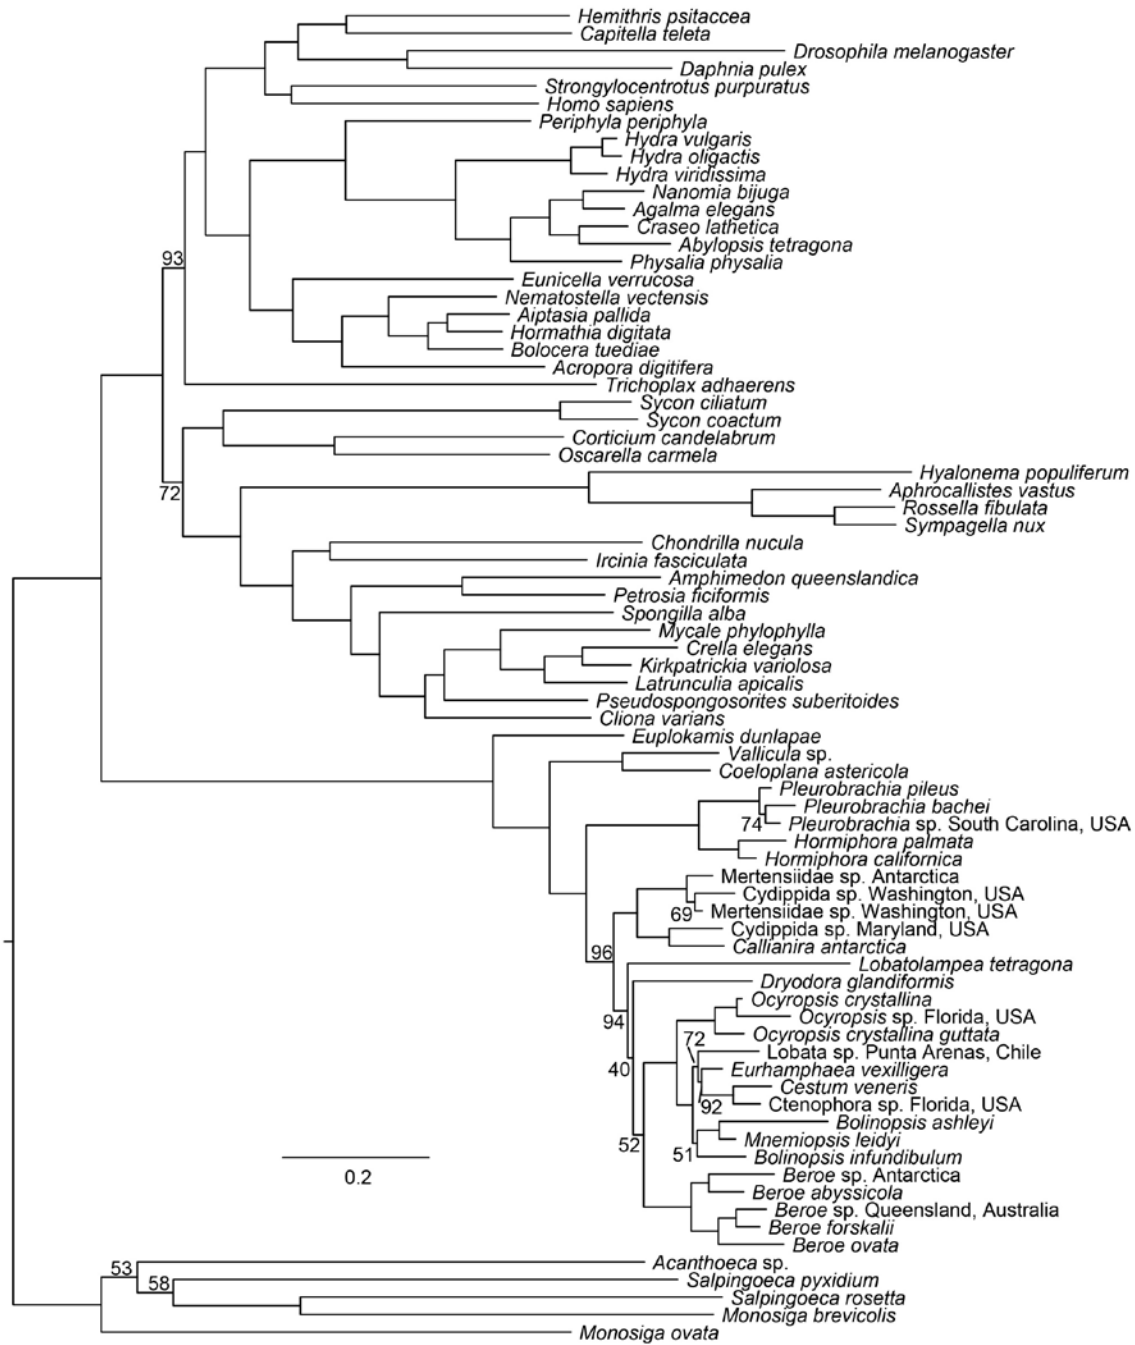

68

69

70

71 Supplementary Figure S15: Time-calibrated phylogeny inferred with BEAST2 and dataset  
 72 metazoan\_Choano\_RCFV\_strict in units of millions of years. Nodes have 1.00 PP unless otherwise noted.  
 73 95% confidence intervals of divergence time estimate are displayed on nodes.

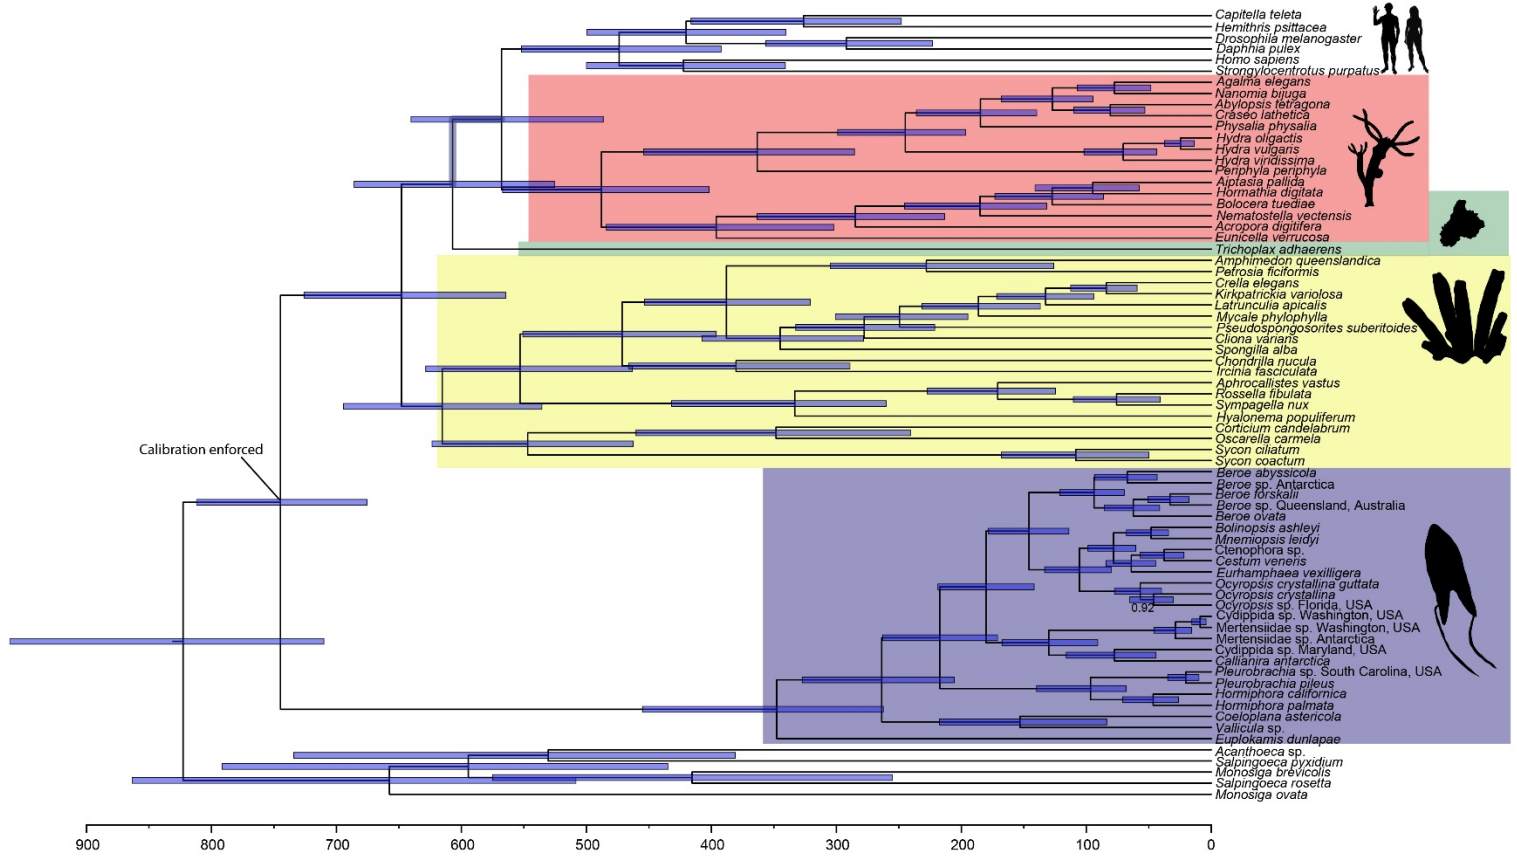

75  
 76  
 77  
 78  
 79  
 80  
 81  
 82

83 Supplementary Figure S16: Phylogeny inferred with RAxML and dataset Ctenophore\_full. Nodes have  
 84 100% BS unless otherwise noted.

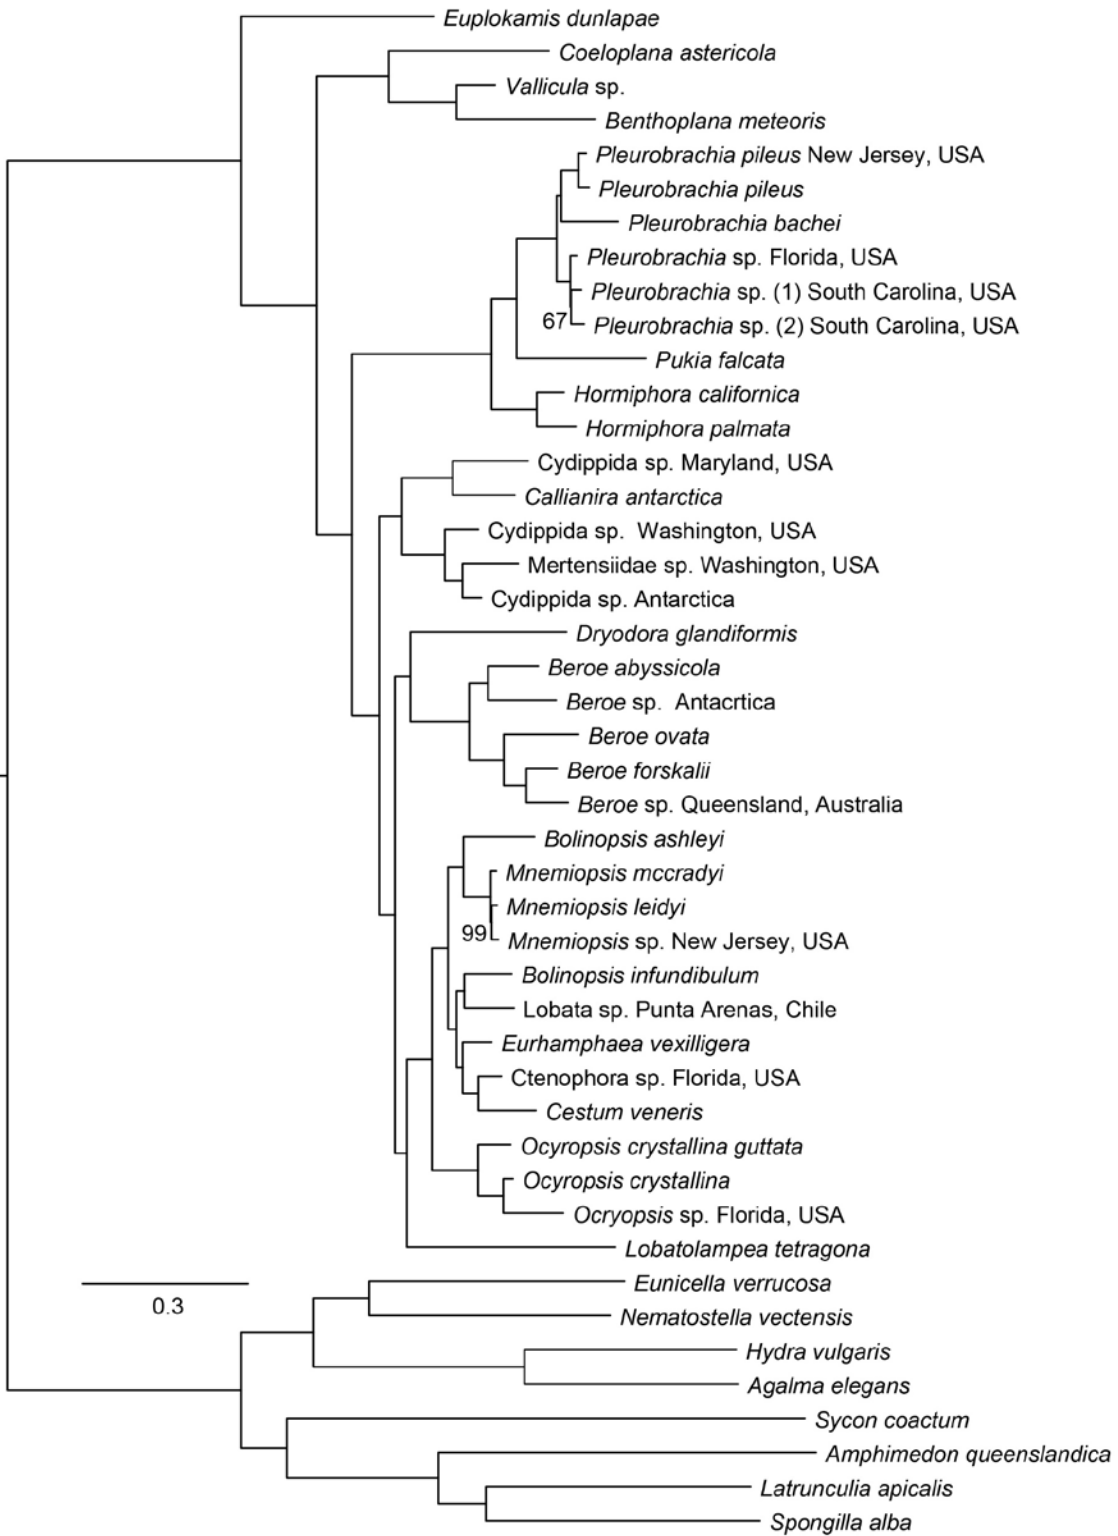

85

86 Supplementary Figure S17: Phylogeny inferred with RAxML and dataset Ctenophore\_LB. Nodes have  
 87 100% BS unless otherwise noted.

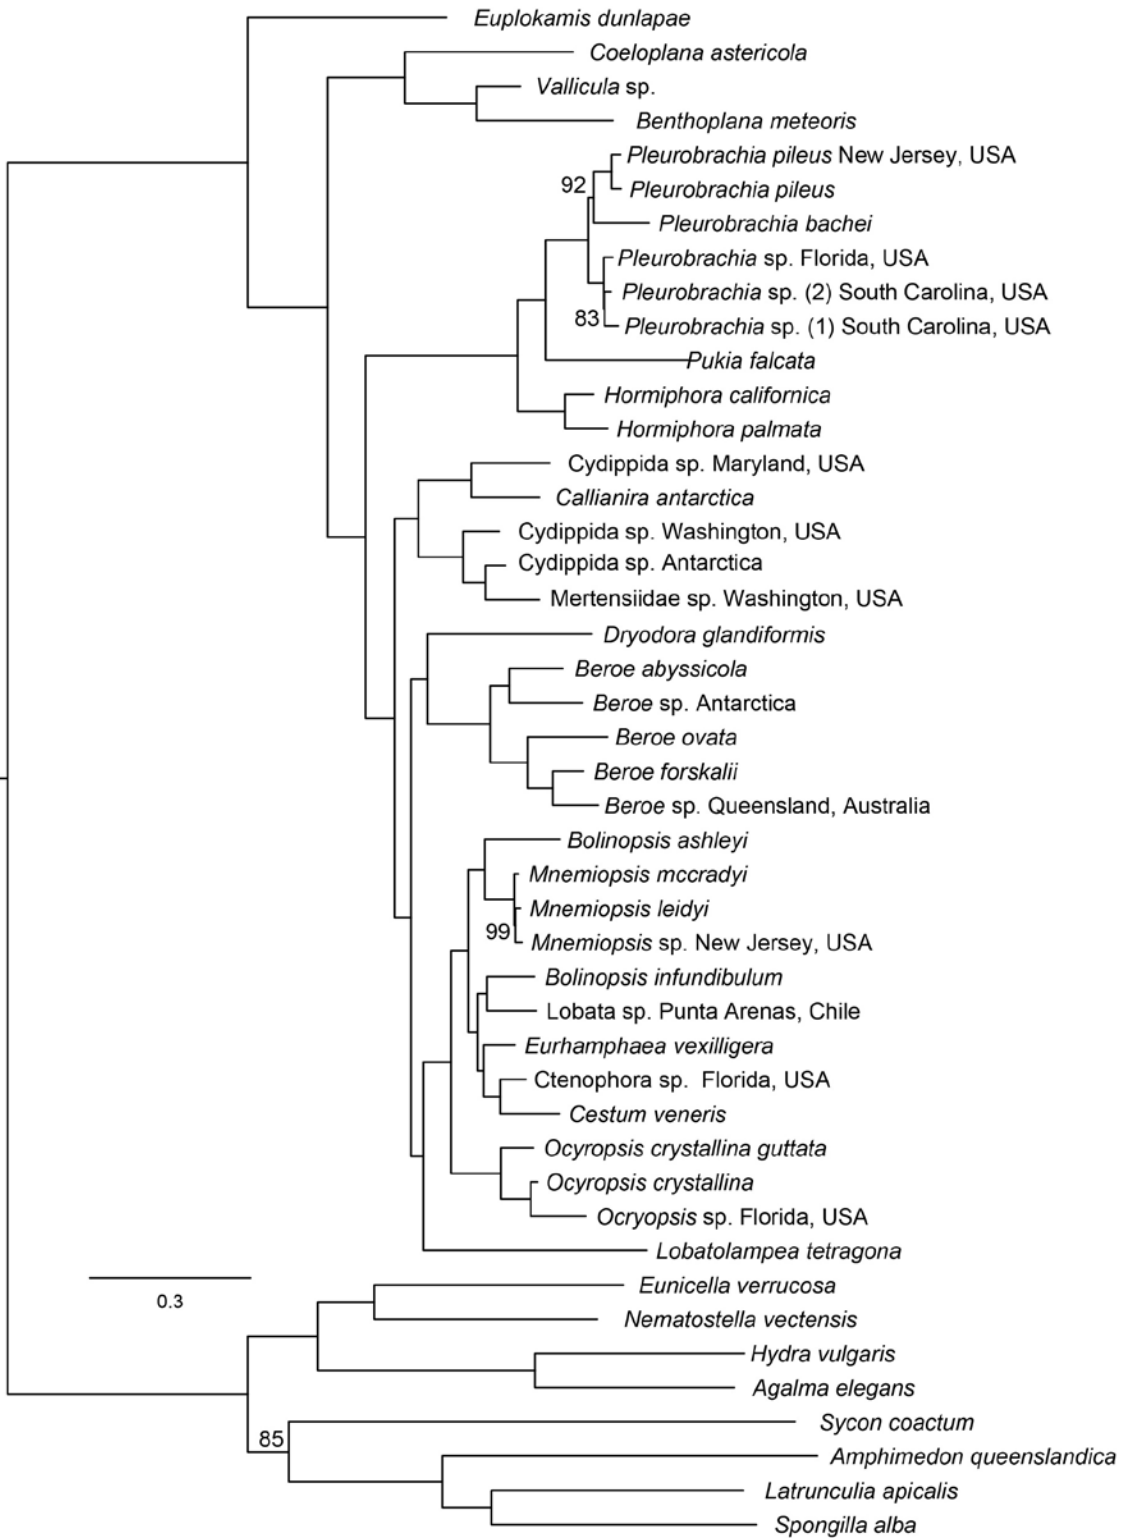



89 Supplementary Figure S18: Phylogeny inferred with RAxML and dataset Ctenophore\_RCFV. Nodes have  
 90 100% BS unless otherwise noted.

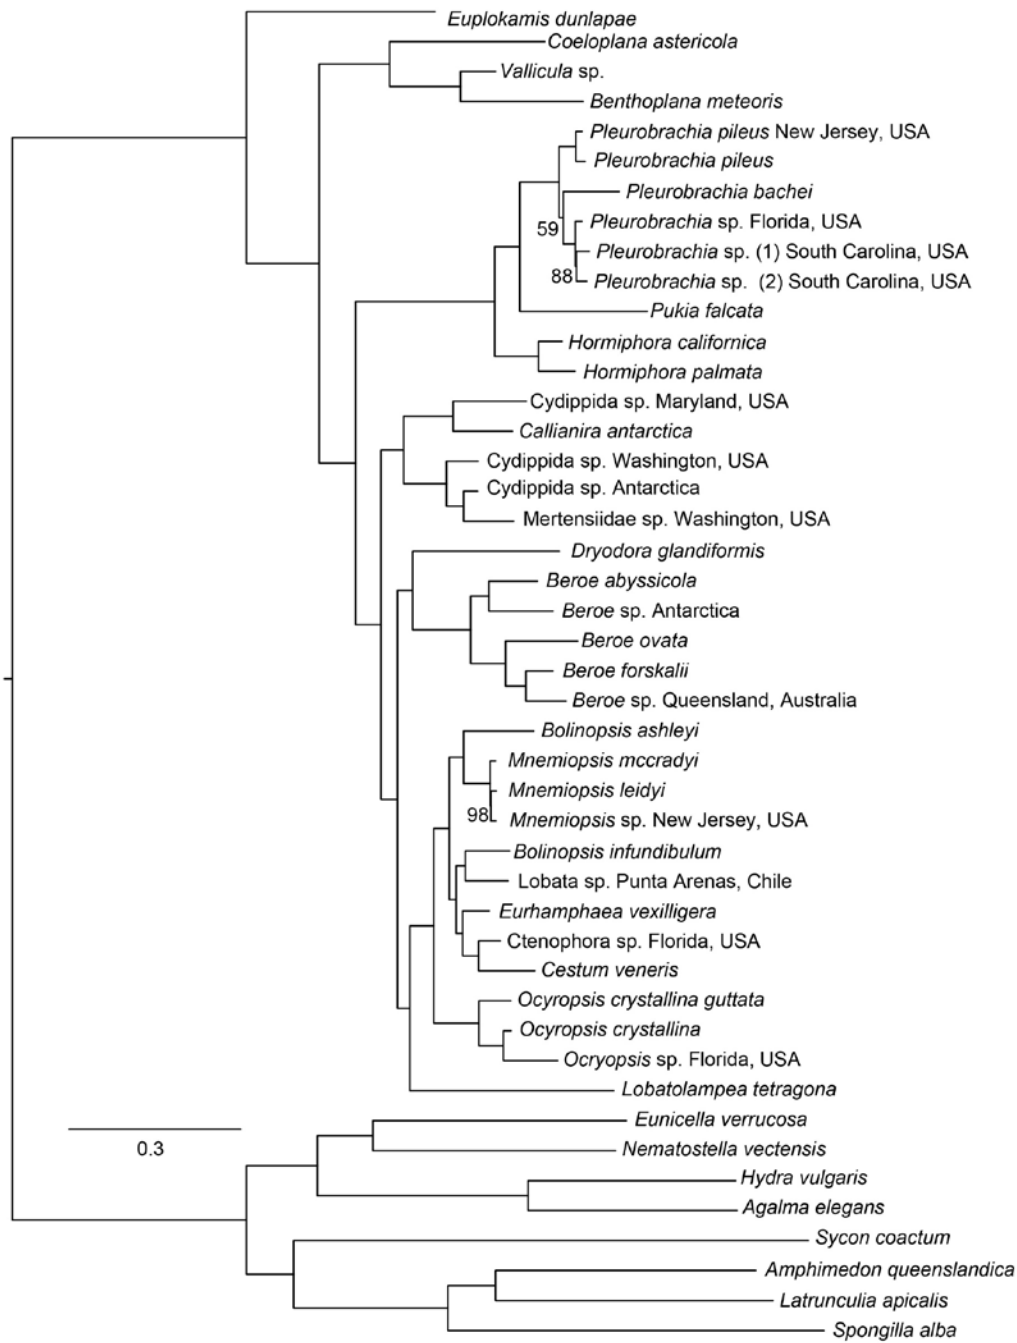

91  
 92  
 93

94 Supplementary Figure S19: Phylogeny inferred with PhyloBayes, the CAT-GTR substitution model and  
 95 dataset Ctenophore\_RCFV\_LB. Nodes have 100% PP unless otherwise noted.

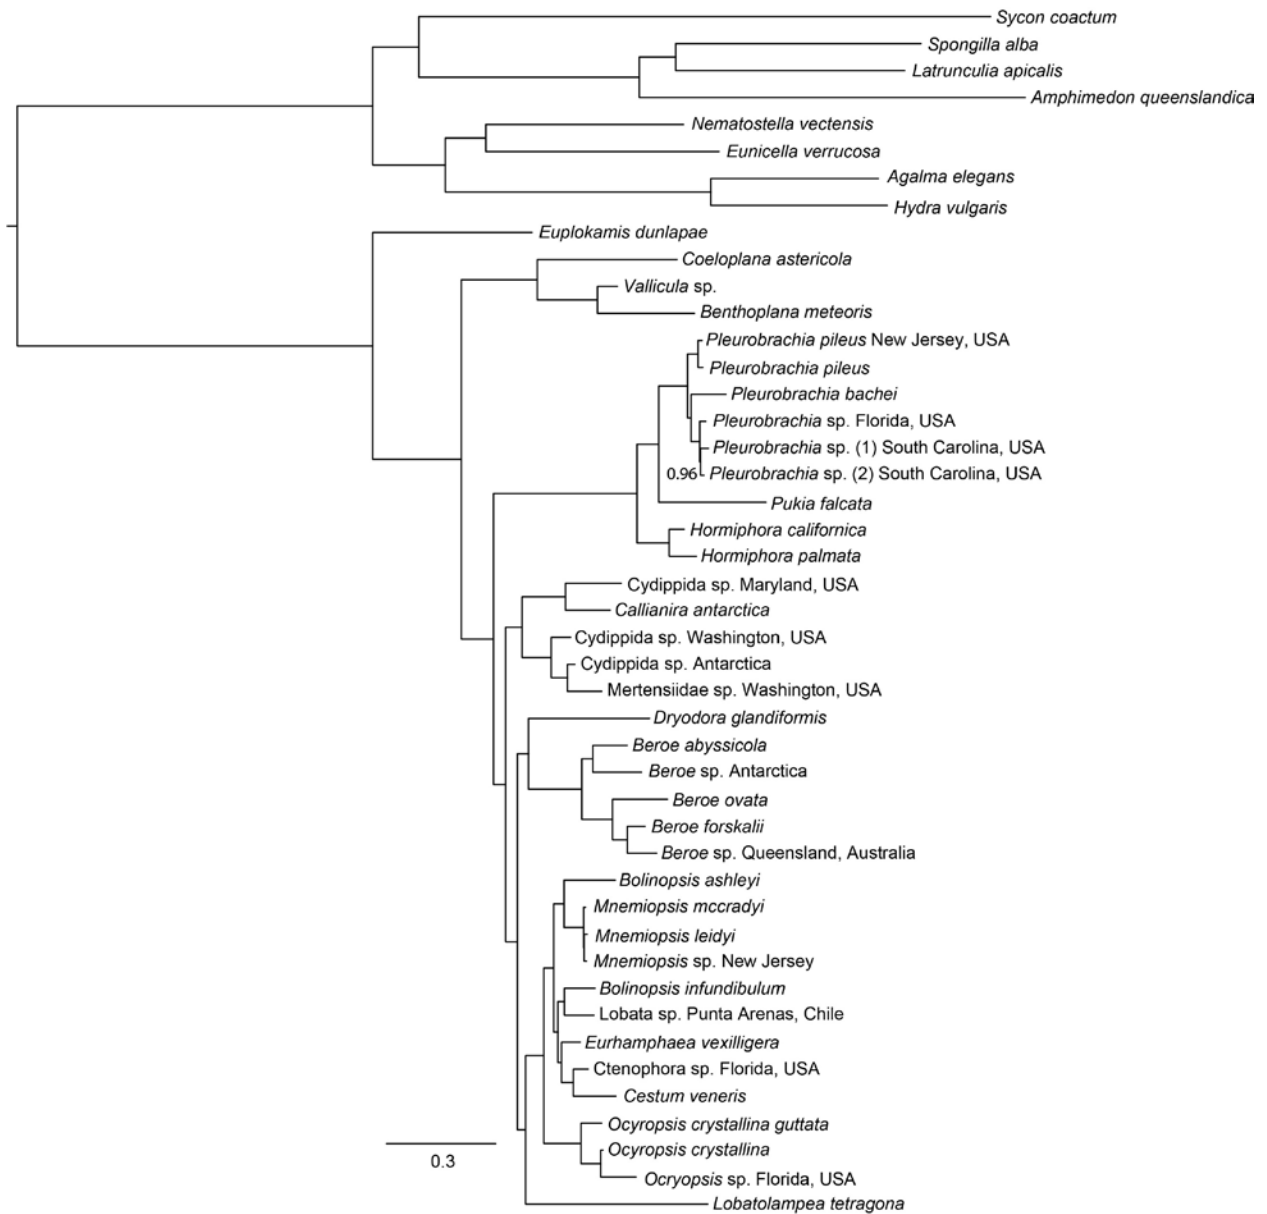

96

97

98

99

100

101 Supplementary Figure S20: Ancestral state reconstruction for a) general ctenophore body and b) primary  
 102 feeding mode using phylogeny inferred with RAxML and dataset ctenophore RCFV\_LB. Outgroups were  
 103 not included in ancestral state reconstruction and are not figured. Nodes labeled with pie charts of  
 104 posterior probability for ancestral state.

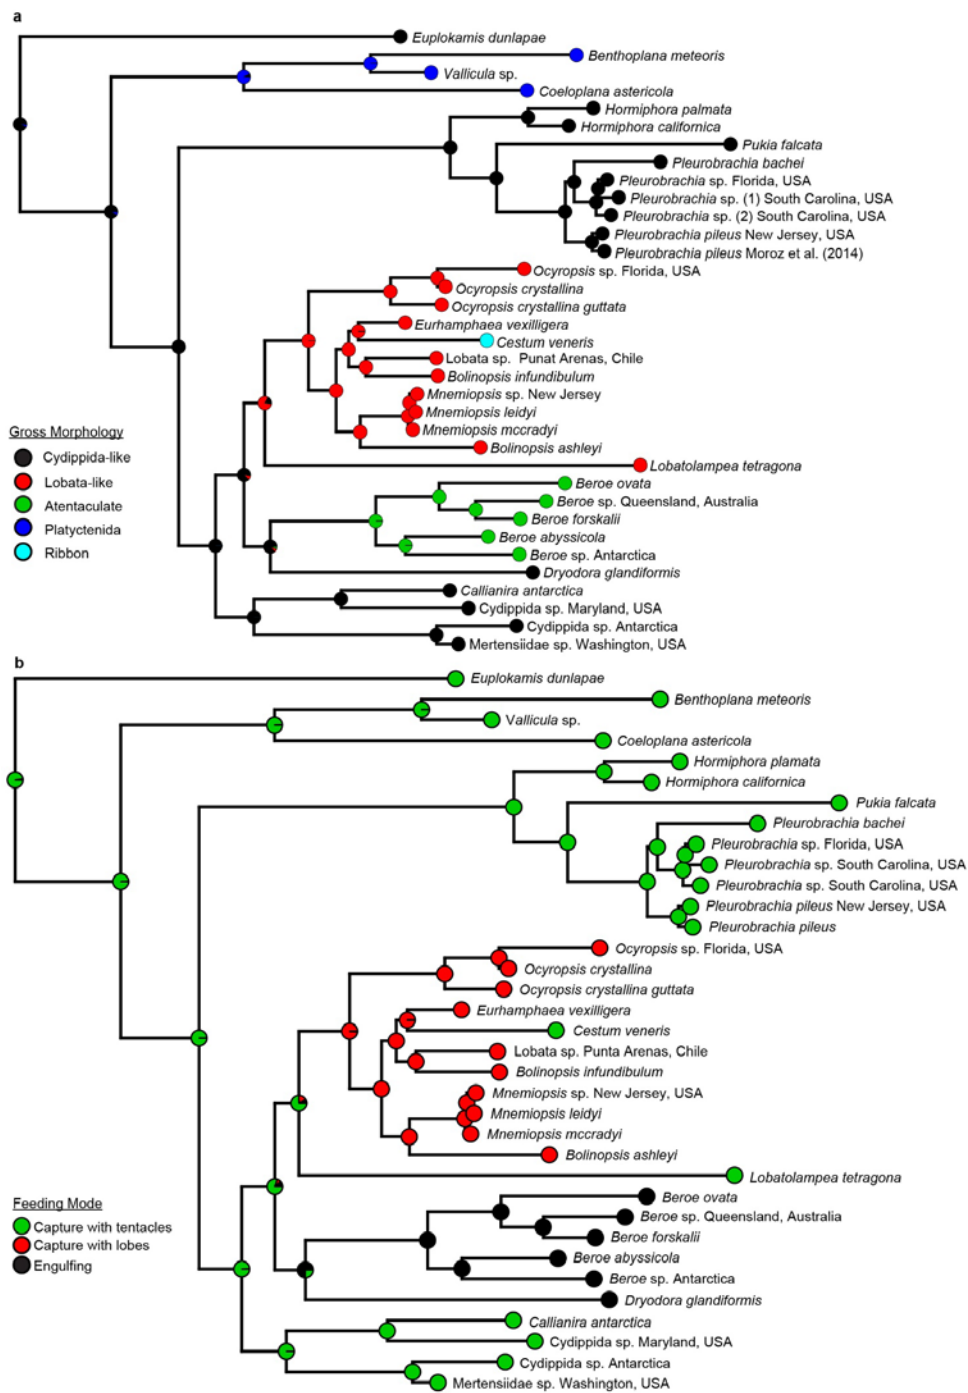

106 Supplementary Figure S21: Ancestral state reconstruction for a) presence of tentacles as adults and b)  
 107 presence of tentacles at any life stage using phylogeny inferred with RAxML and dataset ctenophore  
 108 RCFV\_LB. Outgroups were not included in ancestral state reconstruction and are not figured. Nodes  
 109 labeled with pie charts of posterior probability for ancestral state.

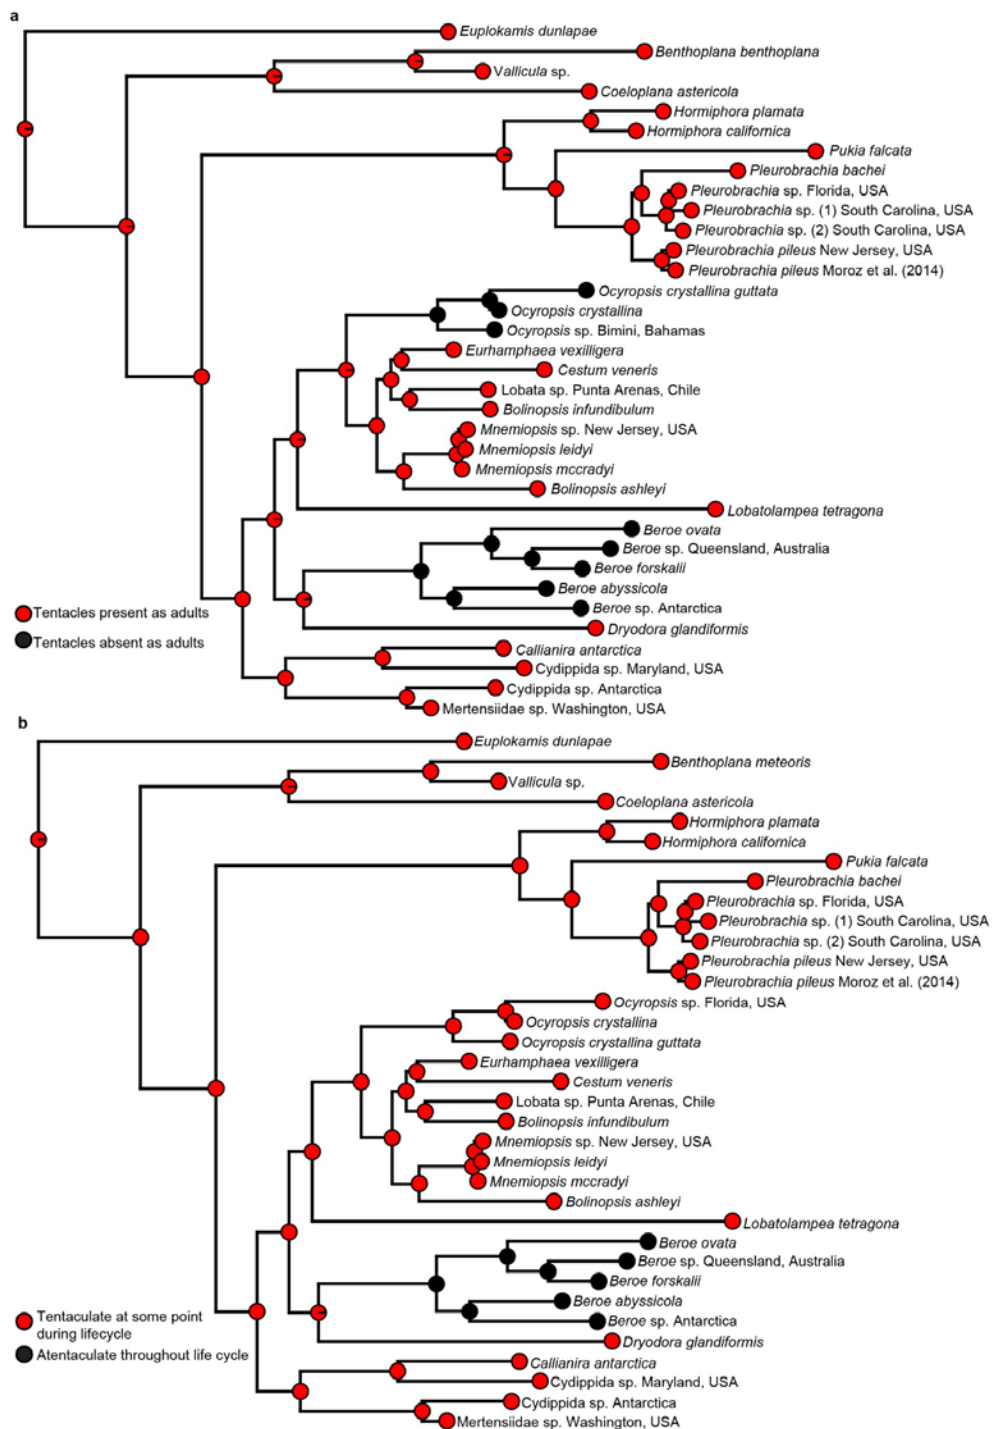

111 Supplementary Figure S22: Ancestral state reconstruction for whether species have separate sexes  
 112 using phylogeny inferred with RAxML and dataset ctenophore RCFV\_LB. Outgroups were not included in  
 113 ancestral state reconstruction and are not figured. Nodes labeled with pie charts of posterior probability  
 114 for ancestral state.

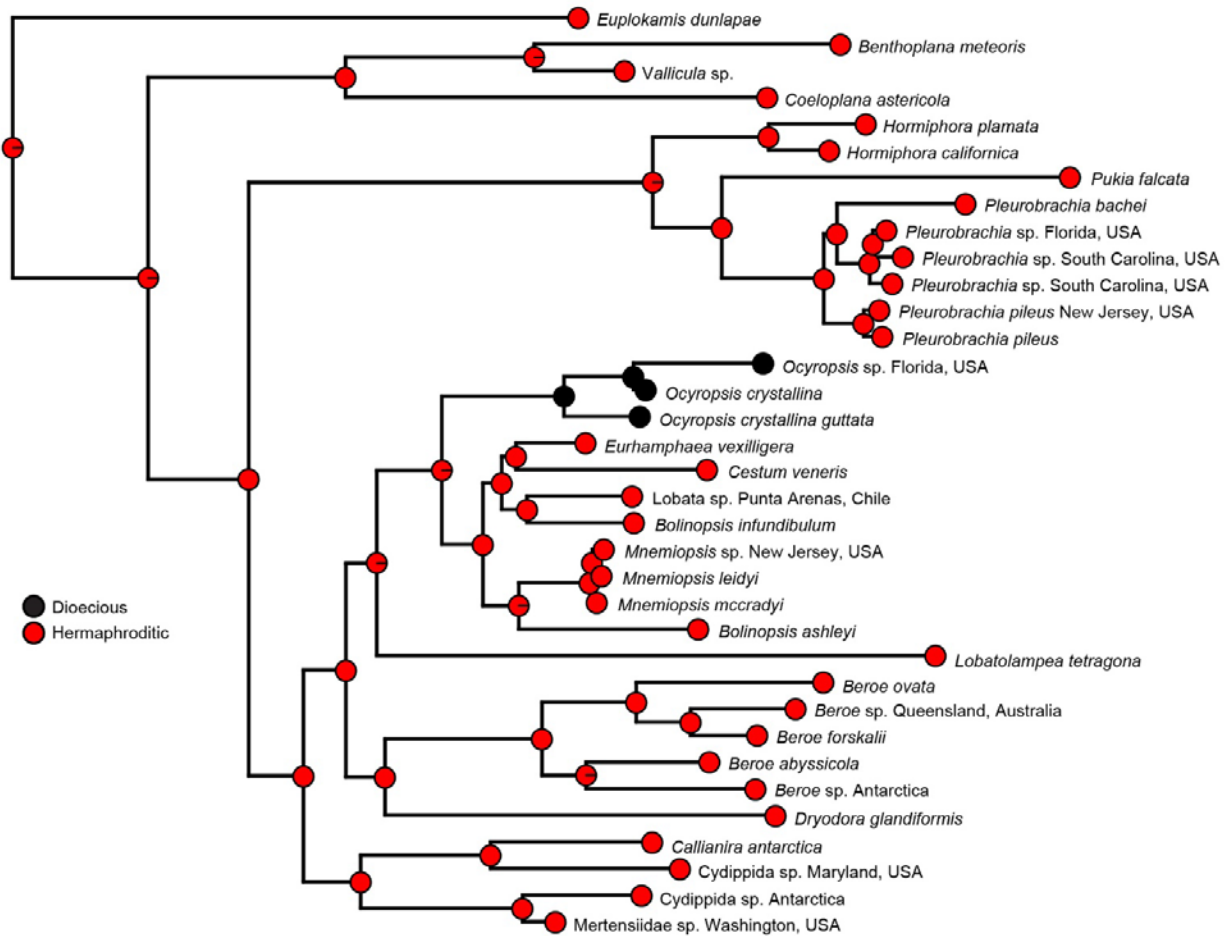

115  
 116  
 117  
 118  
 119  
 120  
 121

122 Supplementary Figure S23: Tree inferred with RAXML and 18S rRNA gene. Nodes with greater than BS  
 123 values greater than 50 are labelled.

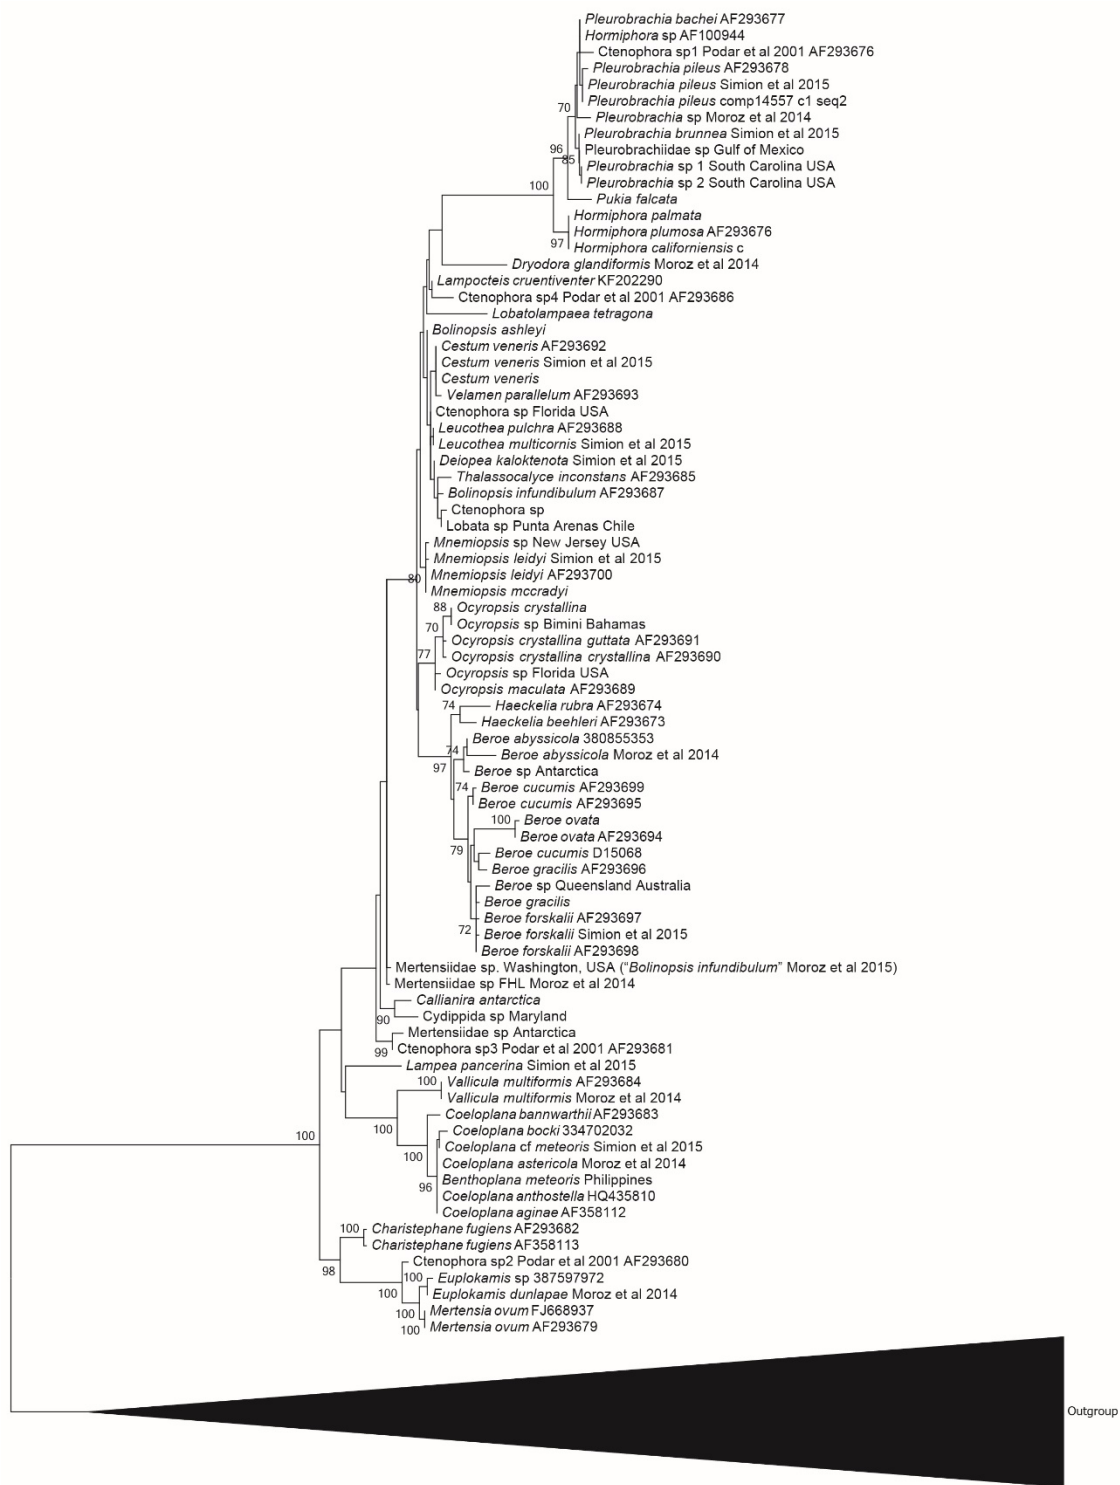

125 Supplementary Figure S24: Ancestral state reconstruction for a) presence of striated muscles and b)  
 126 presence of smooth muscles using phylogeny inferred with RAxML and dataset ctenophore RCFV\_LB.  
 127 Outgroups were not included in ancestral state reconstruction and are not figured. Nodes labeled with  
 128 pie charts of posterior probability for ancestral state.

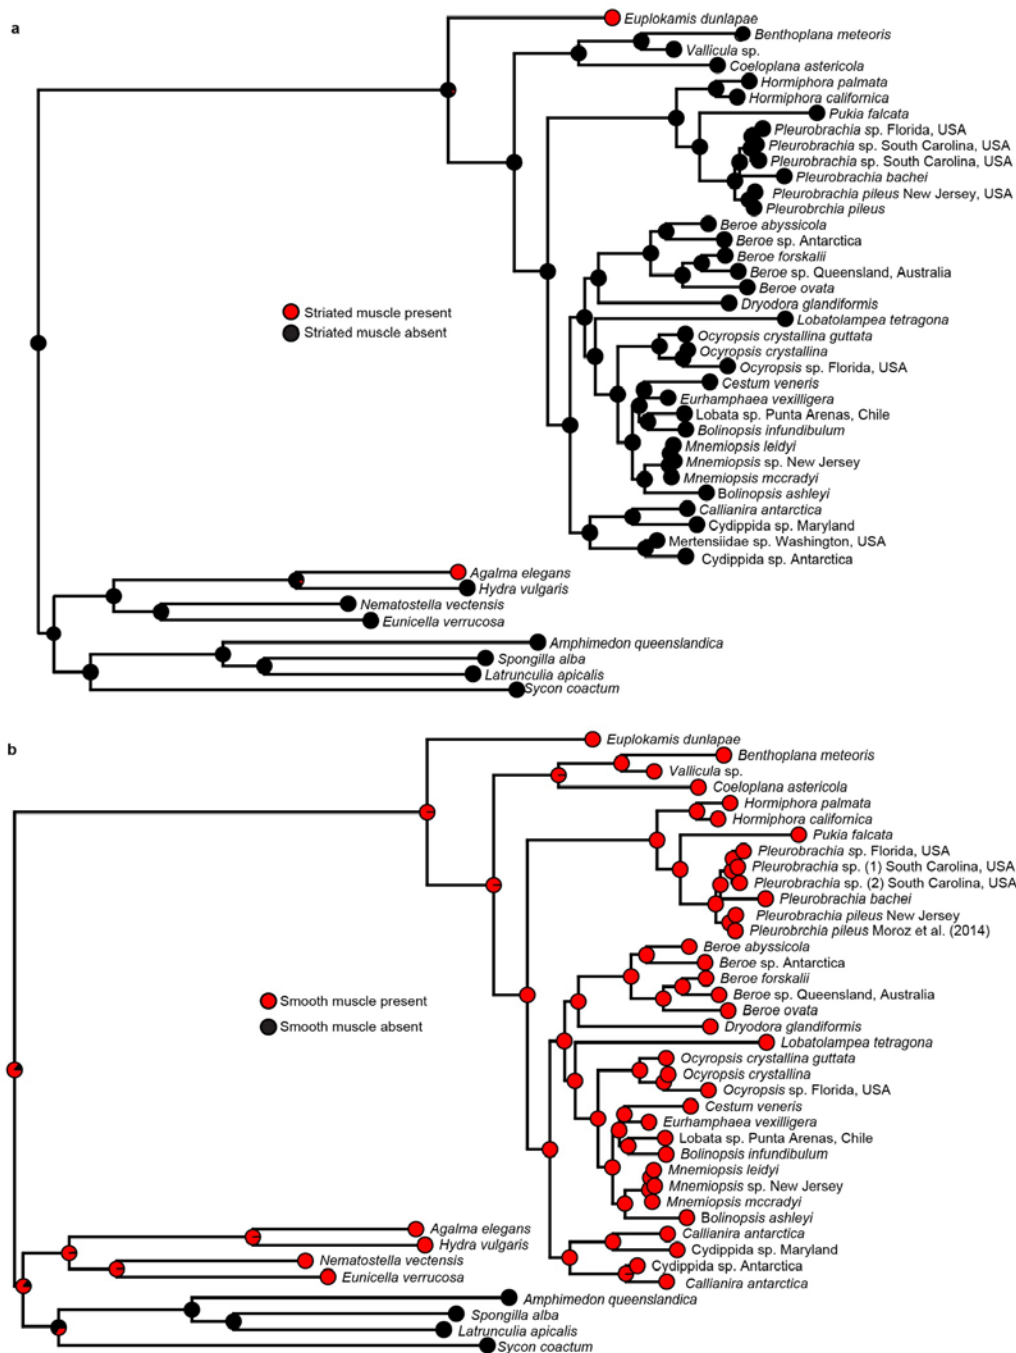

130 Supplementary Figure S25: Ancestral state reconstruction for a) whether species were pelagic or  
 131 benthic/semi-benthic and b) whether species have the ability to bioluminesce using phylogeny inferred  
 132 with RAxML and dataset ctenophore RCFV\_LB. Outgroups were not included in ancestral state  
 133 reconstruction and are not figured. Nodes labeled with pie charts of posterior probability for ancestral  
 134 state.

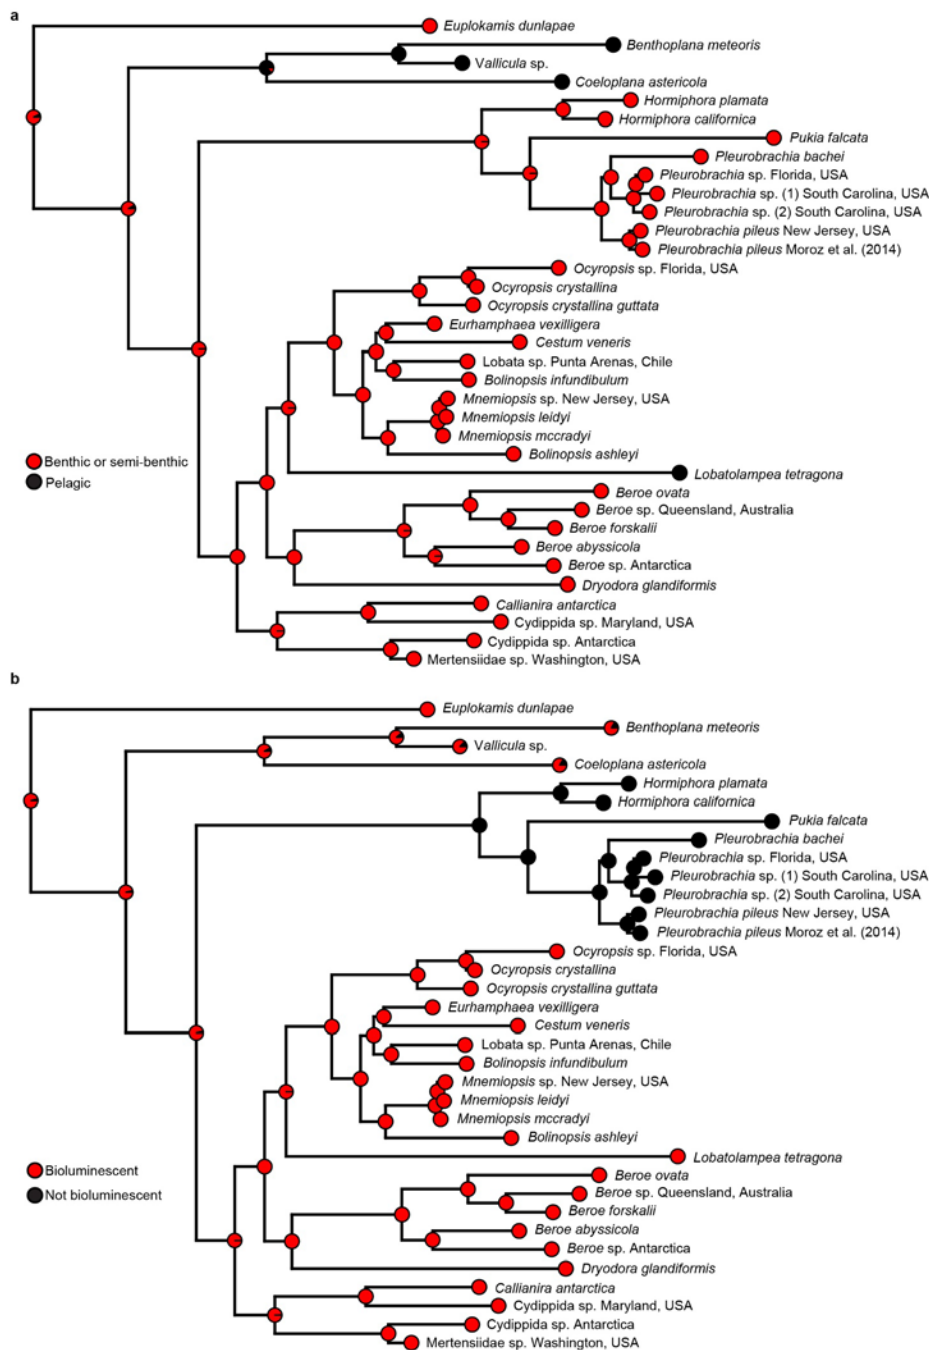



136 Supplementary Figure S26: Density plots of metrics indicating the degree to which OGs may cause  
 137 systematic error. Shaded areas indicate genes that were removed to create certain datasets (see  
 138 Extended Data Table 1). a) Dataset Metazoa\_full. b) Dataset Metazoa\_Choano. c) Dataset  
 139 Ctenophore\_full.

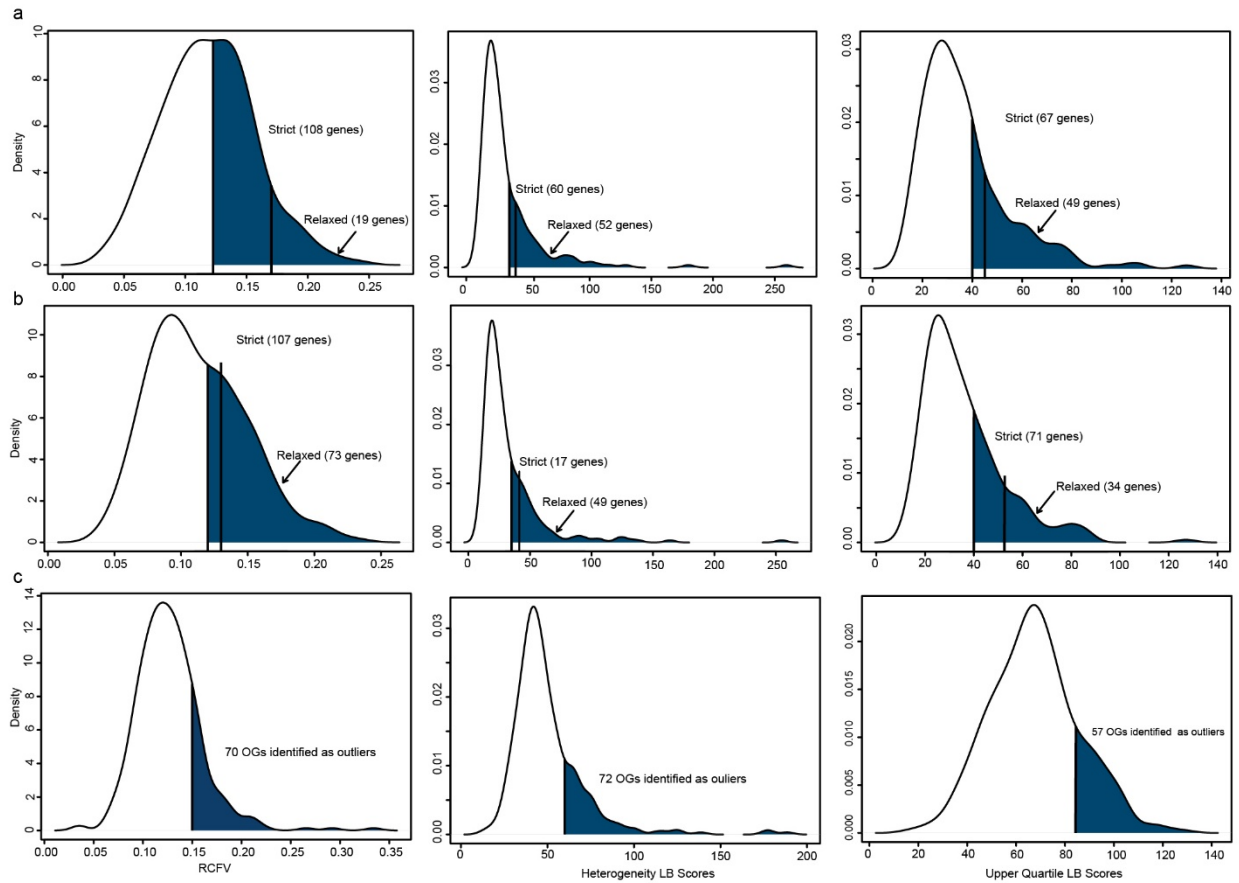

140

141
